# Supplementary material for: Properties of IRMOF-14 and its analogues M-IRMOF-14 (M = Cd, alkaline earth metals): electronic structure, structural stability, chemical bonding, and optical properties
Source: Royal Society of Chemistry journal article supplement (doi:10.1039/c2cp24091b), 2012-01-01
Supplement: c2cp24091b.pdf [file c2cp24091b.pdf]

# Prediction and understanding of experimental synthesized IRMOF-14 and its analogues (*M*-IRMOF-14, *M*=cadmium, alkaline earth metals) on the electronic structure, structural stability, chemical bonding, and optical properties

## *Supporting Information*

Li-Ming Yang\*<sup>†</sup>, Ponniah Ravindran<sup>‡</sup>, Ponniah Vajeeston<sup>‡</sup>, and Mats Tilset\*<sup>†</sup>

<sup>†</sup>*Center of Theoretical and Computational Chemistry, Department of Chemistry, University of Oslo, P.O.Box 1033 Blindern, N-0315 Oslo, Norway,* <sup>‡</sup>*Center for Materials Science and Nanotechnology, Department of Chemistry, University of Oslo, P.O.Box 1033 Blindern, N-0315 Oslo, Norway*

(E-mail of corresponding authors: [mats.tilset@kjemi.uio.no](mailto:mats.tilset@kjemi.uio.no) and [l.m.yang@kjemi.uio.no](mailto:l.m.yang@kjemi.uio.no).; Fax: +47 22855441;)

Page 2, **Fig. S1.** Calculated charge density, charge transfer, and ELF plots for Zn-IRMOF-14  
Page 3, **Fig. S2.** Calculated charge density, charge transfer, and ELF plots for Cd-IRMOF-14  
Page 4, **Fig. S3.** Calculated charge density, charge transfer, and ELF plots for Be-IRMOF-14  
Page 5, **Fig. S4.** Calculated charge density, charge transfer, and ELF plots for Mg-IRMOF-14  
Page 6, **Fig. S5.** Calculated charge density, charge transfer, and ELF plots for Ca-IRMOF-14  
Page 7, **Fig. S6.** Calculated charge density, charge transfer, and ELF plots for Sr-IRMOF-14  
Page 8, **Fig. S7.** Calculated charge density, charge transfer, and ELF plots for Ba-IRMOF-14  
Page 9, **Fig. S8.** Calculated TDOS and PDOS for Cd-IRMOF-14  
Page 10, **Fig. S9.** Calculated TDOS and PDOS for Be-IRMOF-14  
Page 11, **Fig. S10.** Calculated TDOS and PDOS for Mg-IRMOF-14  
Page 12, **Fig. S11.** Calculated TDOS and PDOS for Ca-IRMOF-14  
Page 13, **Fig. S12.** Calculated TDOS and PDOS for Sr-IRMOF-14  
Page 14, **Fig. S13.** Calculated TDOS and PDOS for Ba-IRMOF-14  
  
Page 15, **Fig. S14.** Calculated optical properties for Cd-IRMOF-14  
Page 16, **Fig. S15.** The electronic band structure of Cd-IRMOF-14  
Page 17, **Fig. S16.** Calculated optical properties for Be-IRMOF-14  
Page 18, **Fig. S17.** The electronic band structure of Be-IRMOF-14  
Page 19, **Fig. S18.** Calculated optical properties for Mg-IRMOF-14  
Page 20, **Fig. S19.** The electronic band structure of Mg-IRMOF-14  
Page 21, **Fig. S20.** Calculated optical properties for Ca-IRMOF-14  
Page 22, **Fig. S21.** The electronic band structure of Ca-IRMOF-14  
Page 23, **Fig. S22.** Calculated optical properties for Sr-IRMOF-14  
Page 24, **Fig. S23.** The electronic band structure of Sr-IRMOF-14  
Page 25, **Fig. S24.** Calculated optical properties for Ba-IRMOF-14  
Page 26, **Fig. S25.** The electronic band structure of Ba-IRMOF-14  
Page 27, **Table S1.** Mulliken effective charges (MEC), bond overlap populations (BOP), and Bader charges (BC) for *M*-IRMOF-14 (*M* = Zr, Cd, Be, Mg, Ca, Sr, Ba)

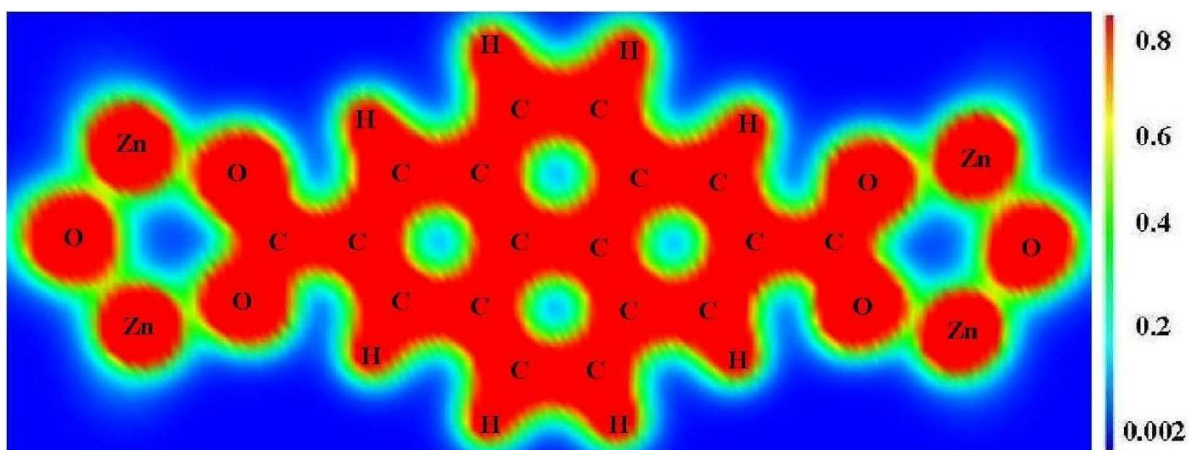

(a)

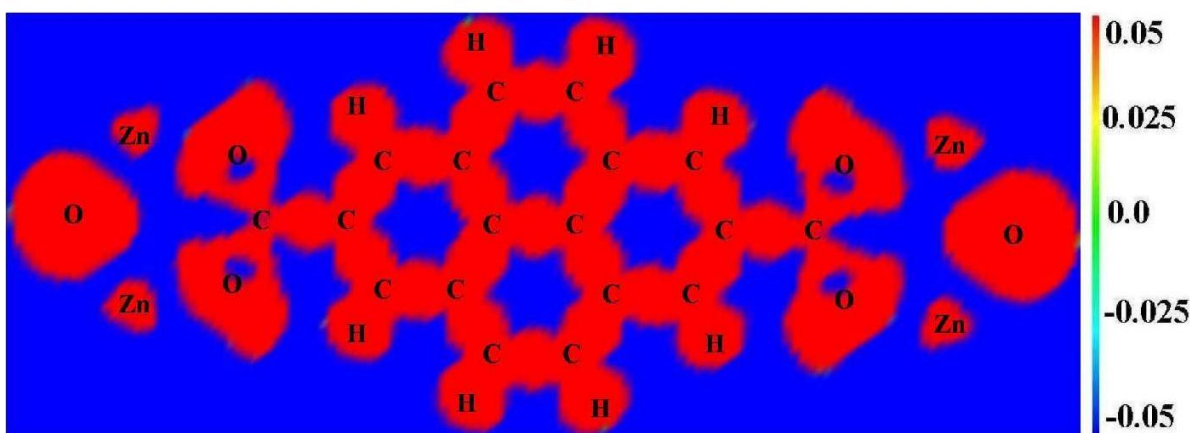

(b)

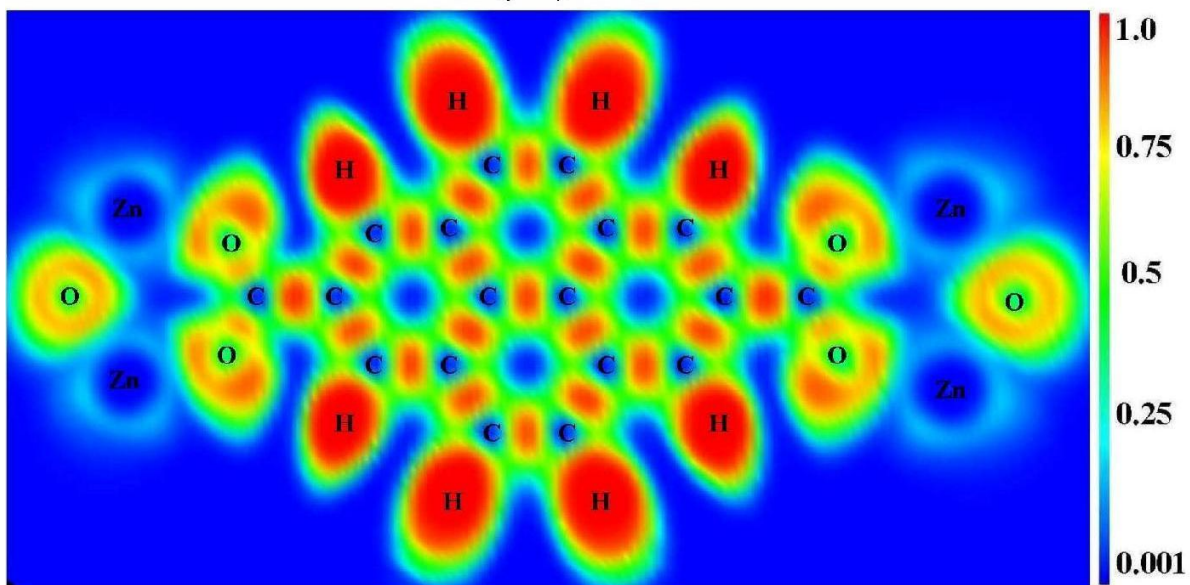

(c)

**Figure S1.** Calculated charge density (a), charge transfer (b), and electron localization function (c) plots for Zn-IRMOF-14 in the (110) plane.

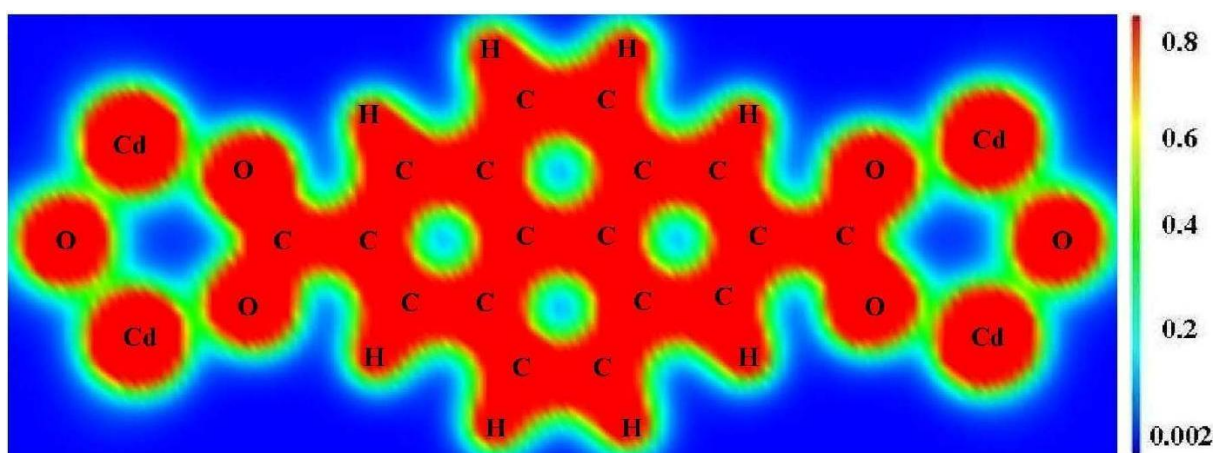

(a)

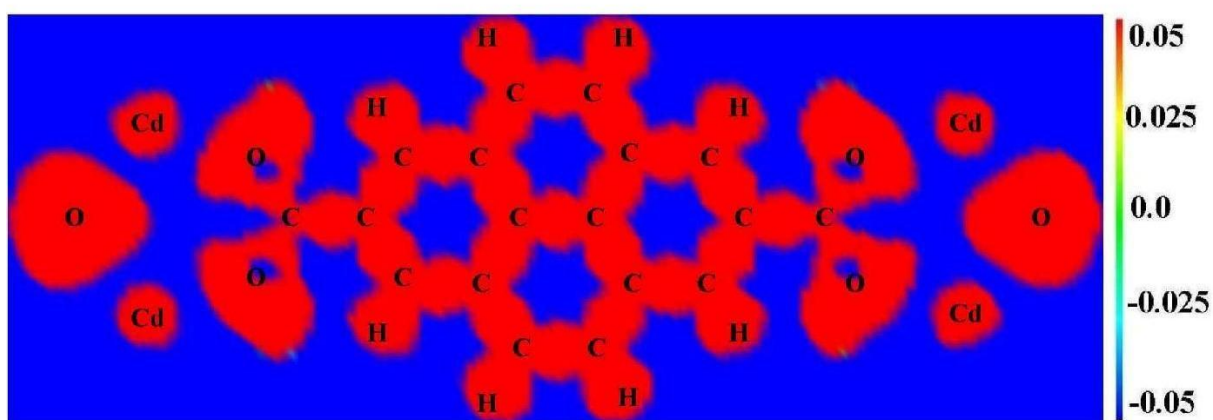

(b)

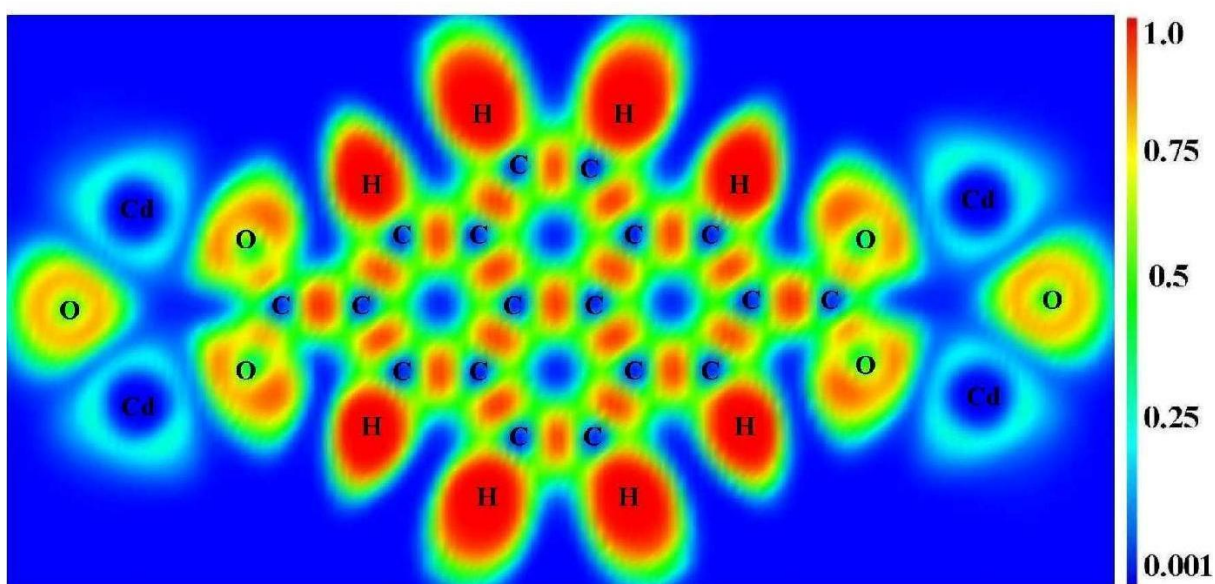

(c)

**Figure S2.** Calculated charge density (a), charge transfer (b), and electron localization function (c) plots for Cd-IRMOF-14 in the (110) plane.

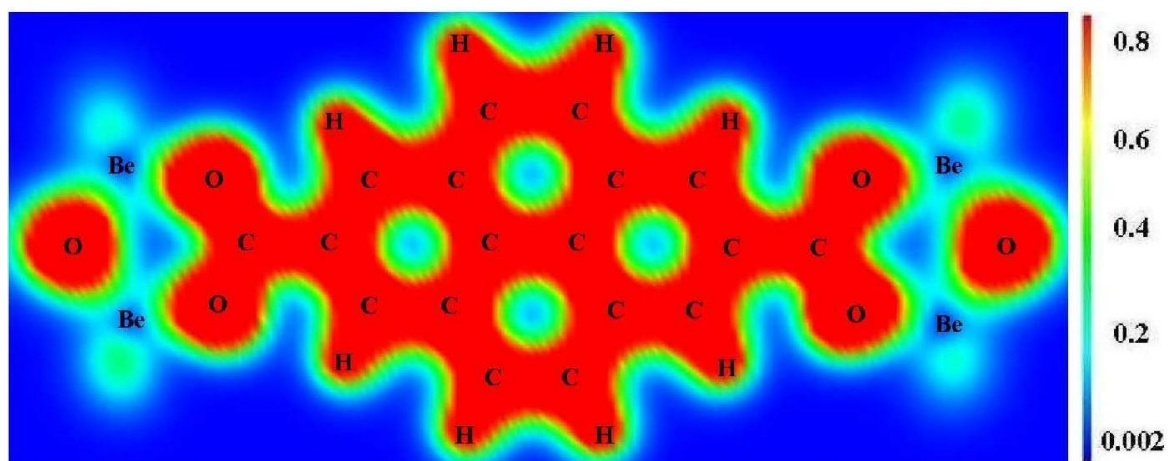

(a)

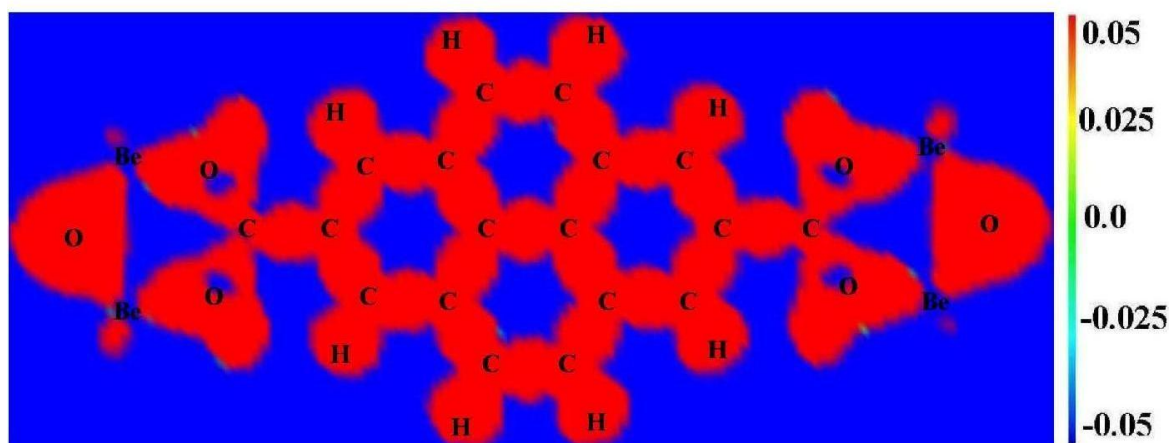

(b)

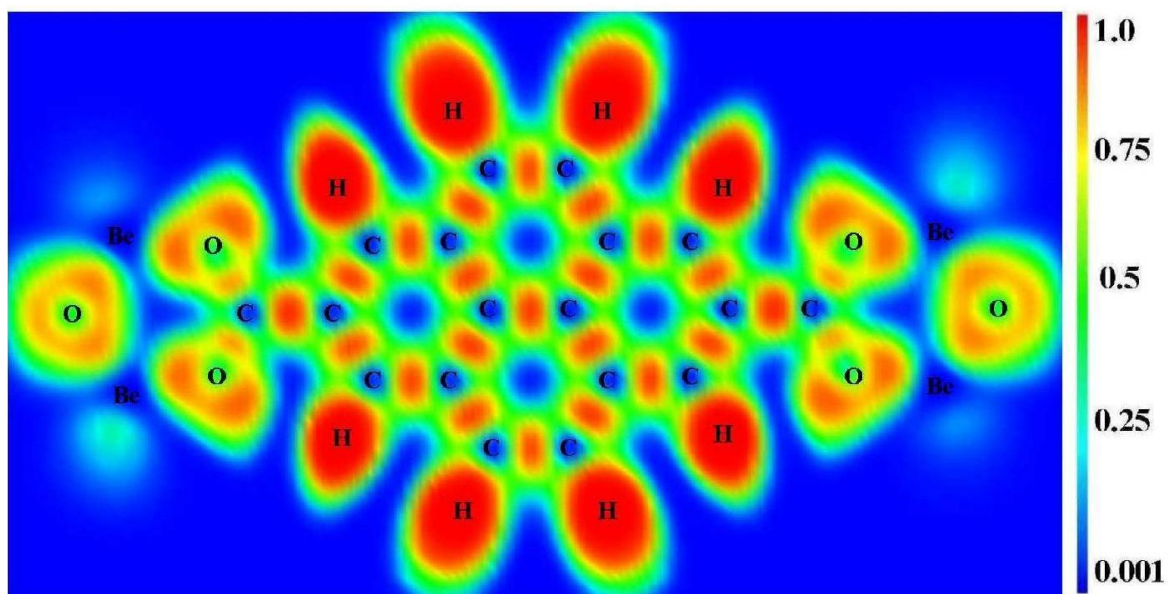

(c)

**Figure S3.** Calculated charge density (a), charge transfer (b), and electron localization function (c) plots for Be-IRMOF-14 in the (110) plane.

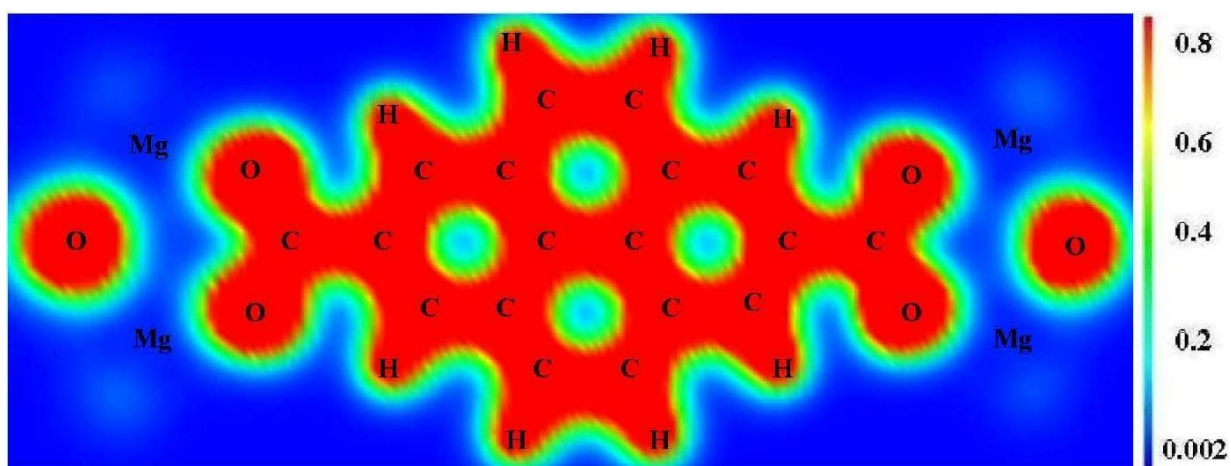

(a)

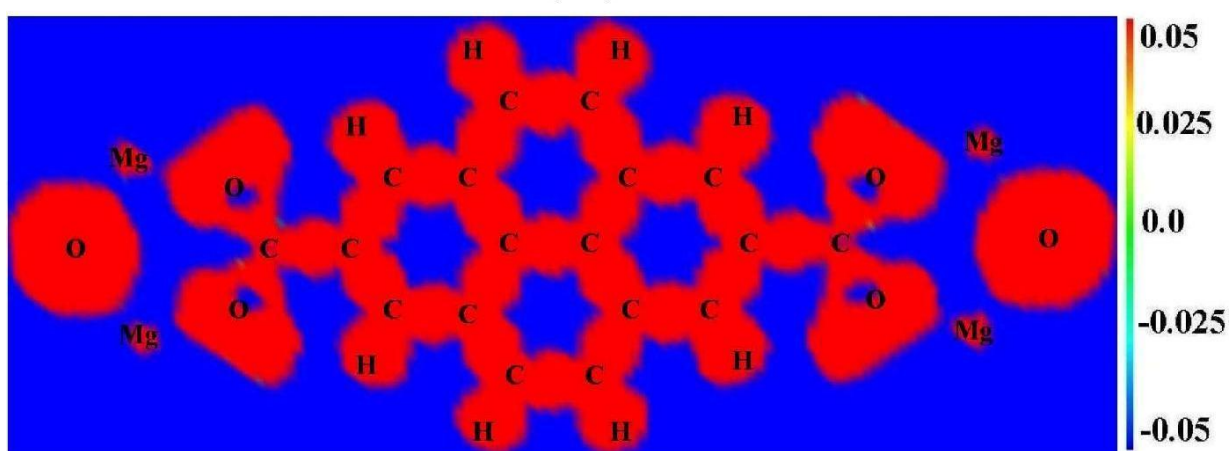

(b)

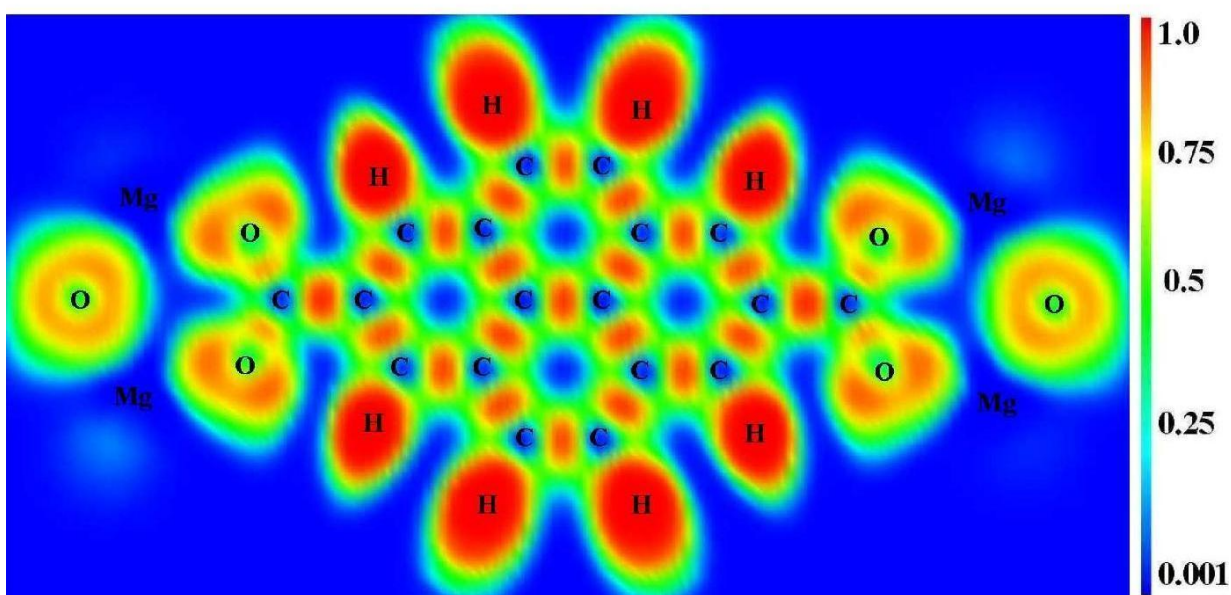

(c)

**Figure S4.** Calculated charge density (a), charge transfer (b), and electron localization function (c) plots for Mg-IRMOF-14 in the (110) plane.

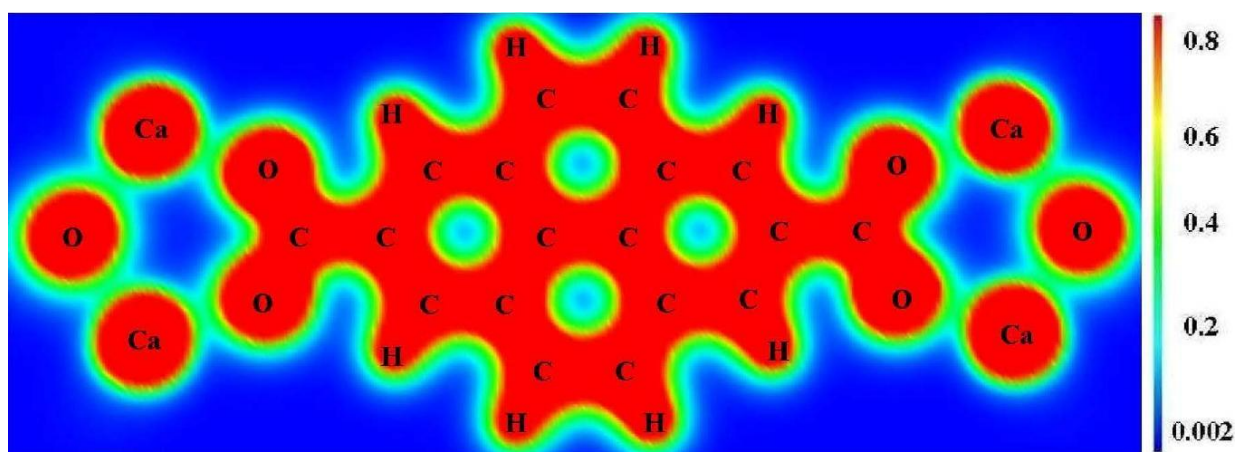

(a)

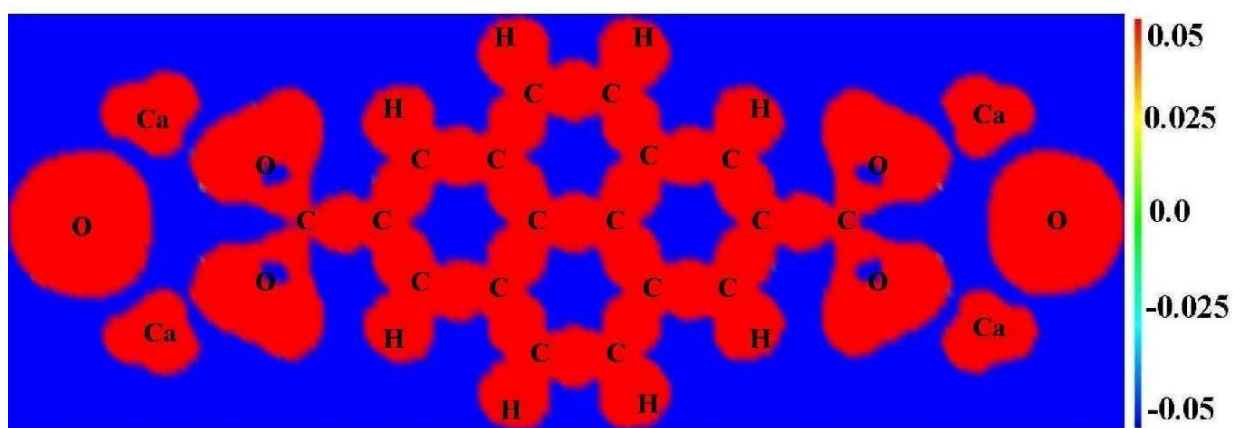

(b)

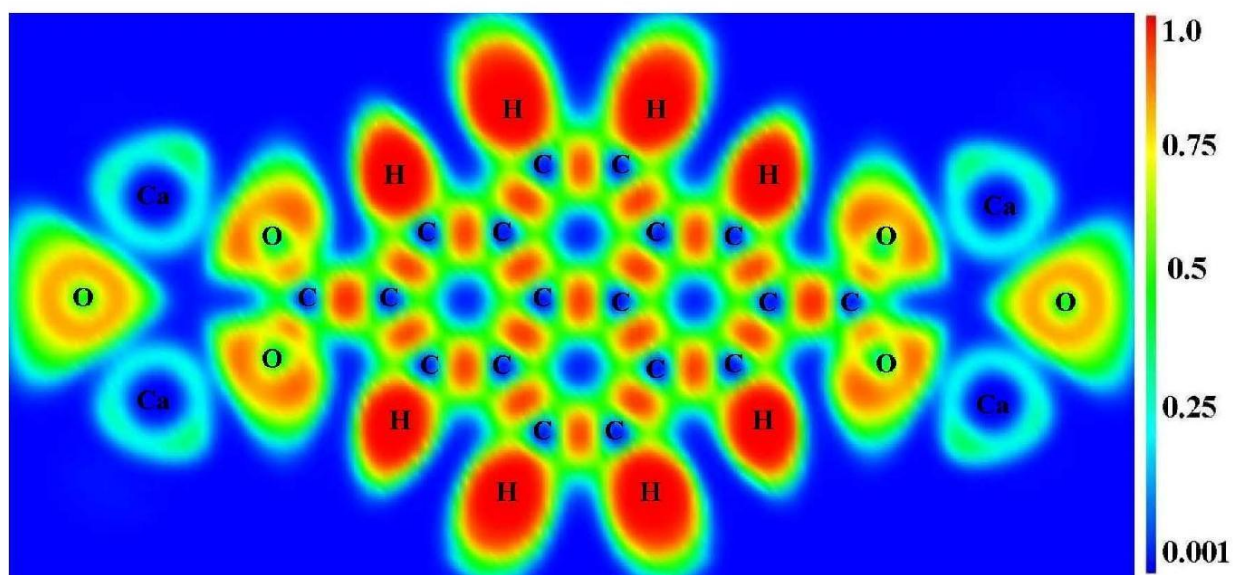

(c)

**Figure S5.** Calculated charge density (a), charge transfer (b), and electron localization function (c) plots for Ca-IRMOF-14 in the (110) plane.

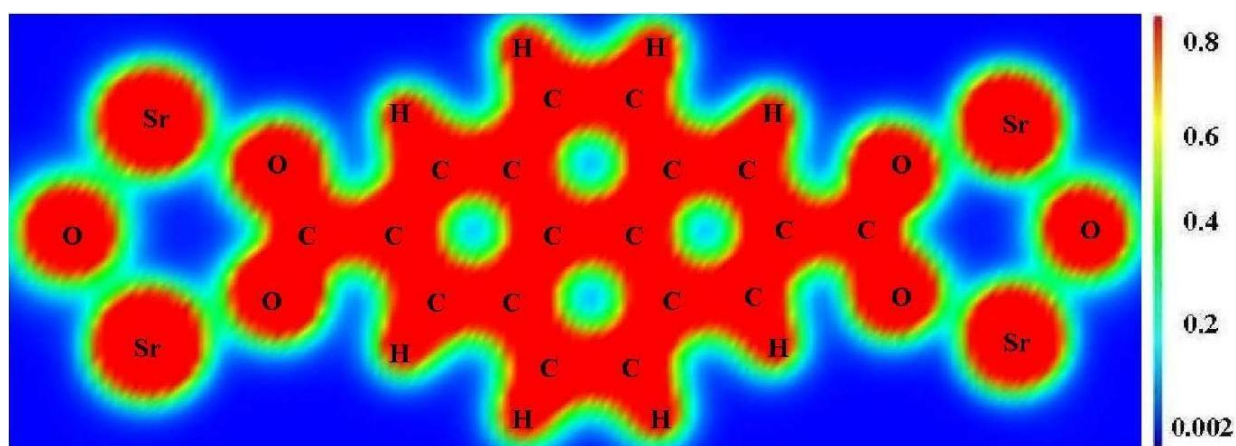

(a)

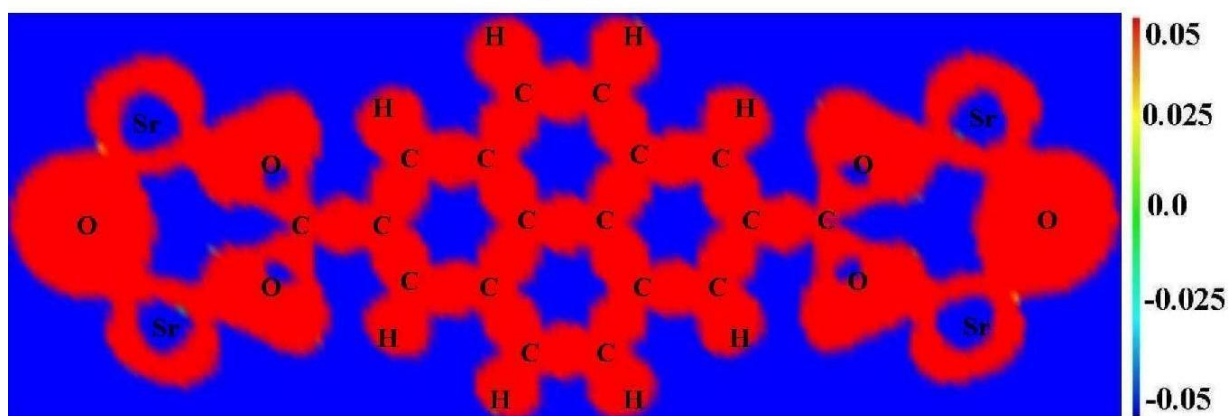

(b)

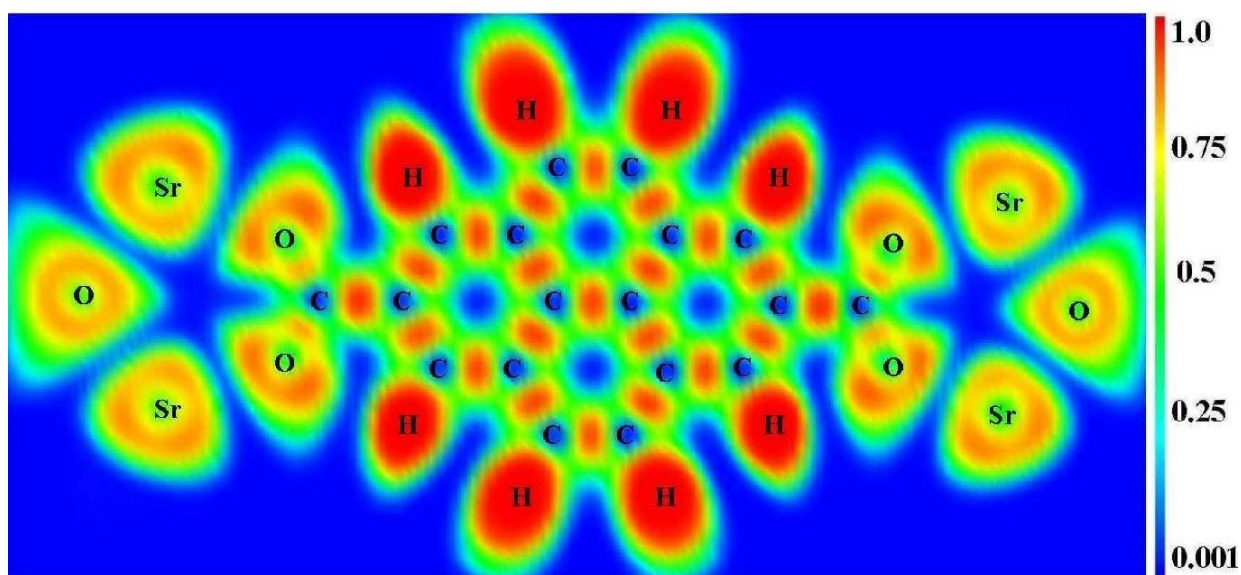

(c)

**Figure S6.** Calculated charge density (a), charge transfer (b), and electron localization function (c) plots for Sr-IRMOF-14 in the (110) plane.

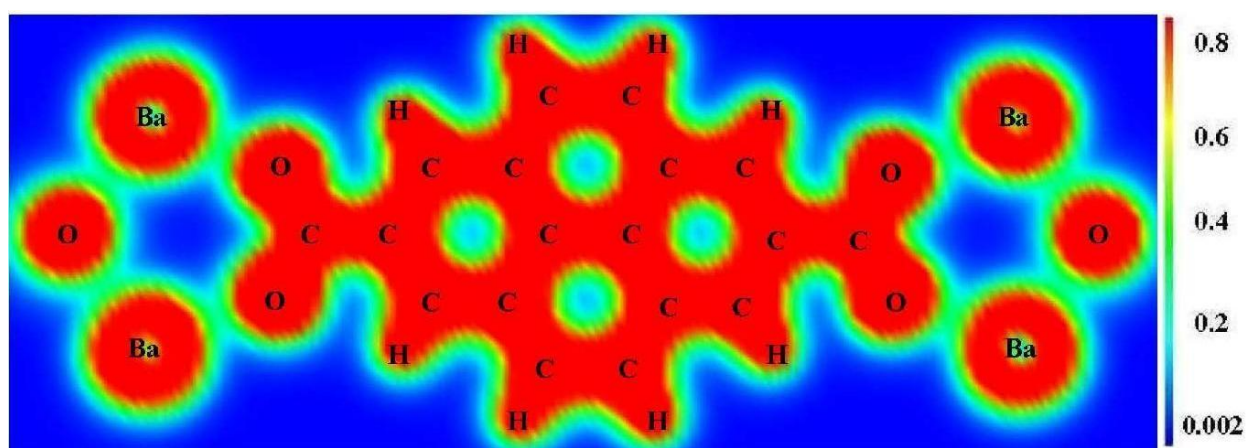

(a)

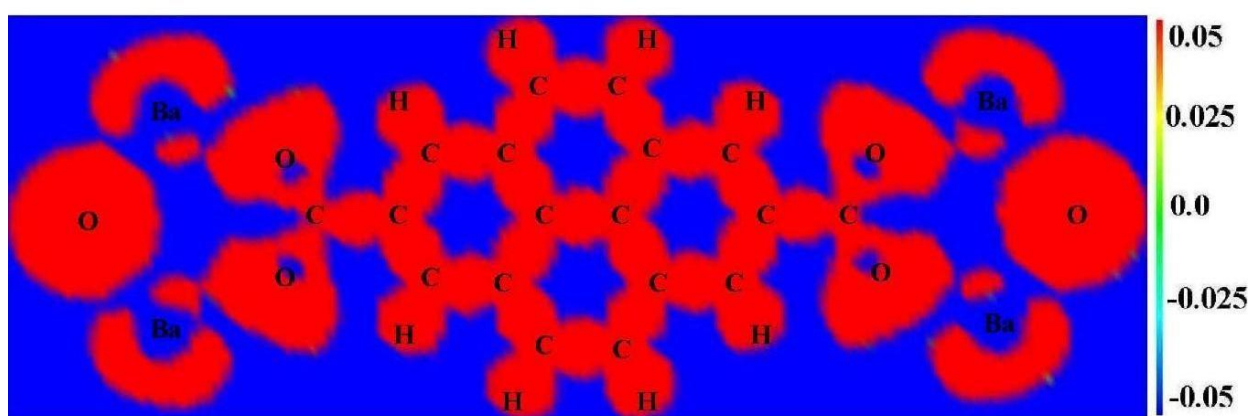

(b)

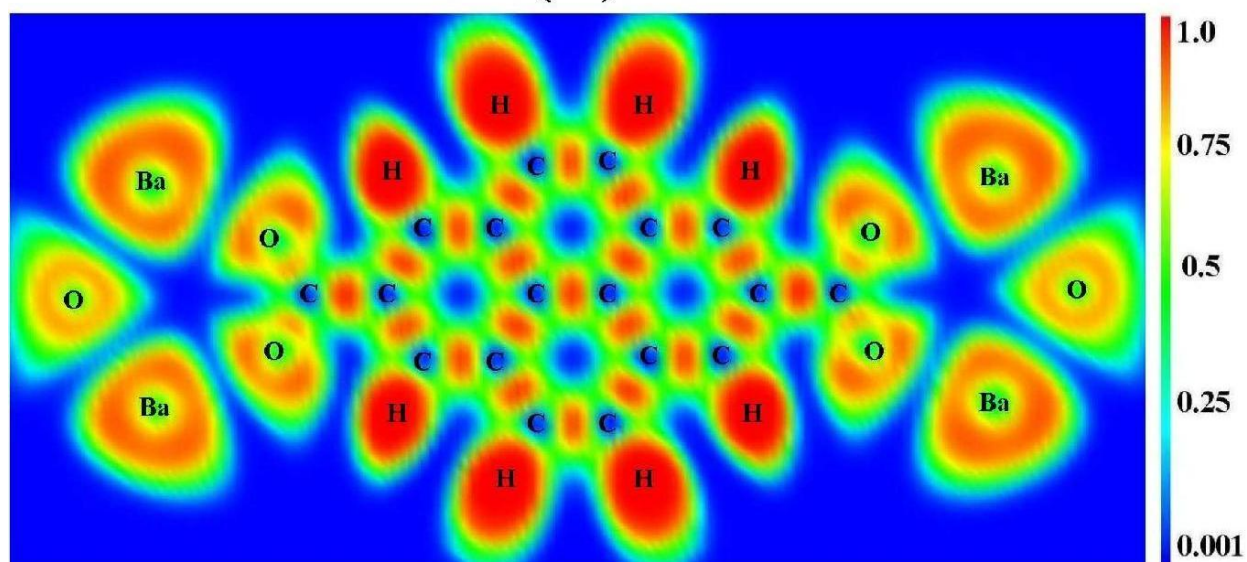

(c)

**Figure S7.** Calculated charge density (a), charge transfer (b), and electron localization function (c) plots for Ba-IRMOF-14 in the (110) plane.



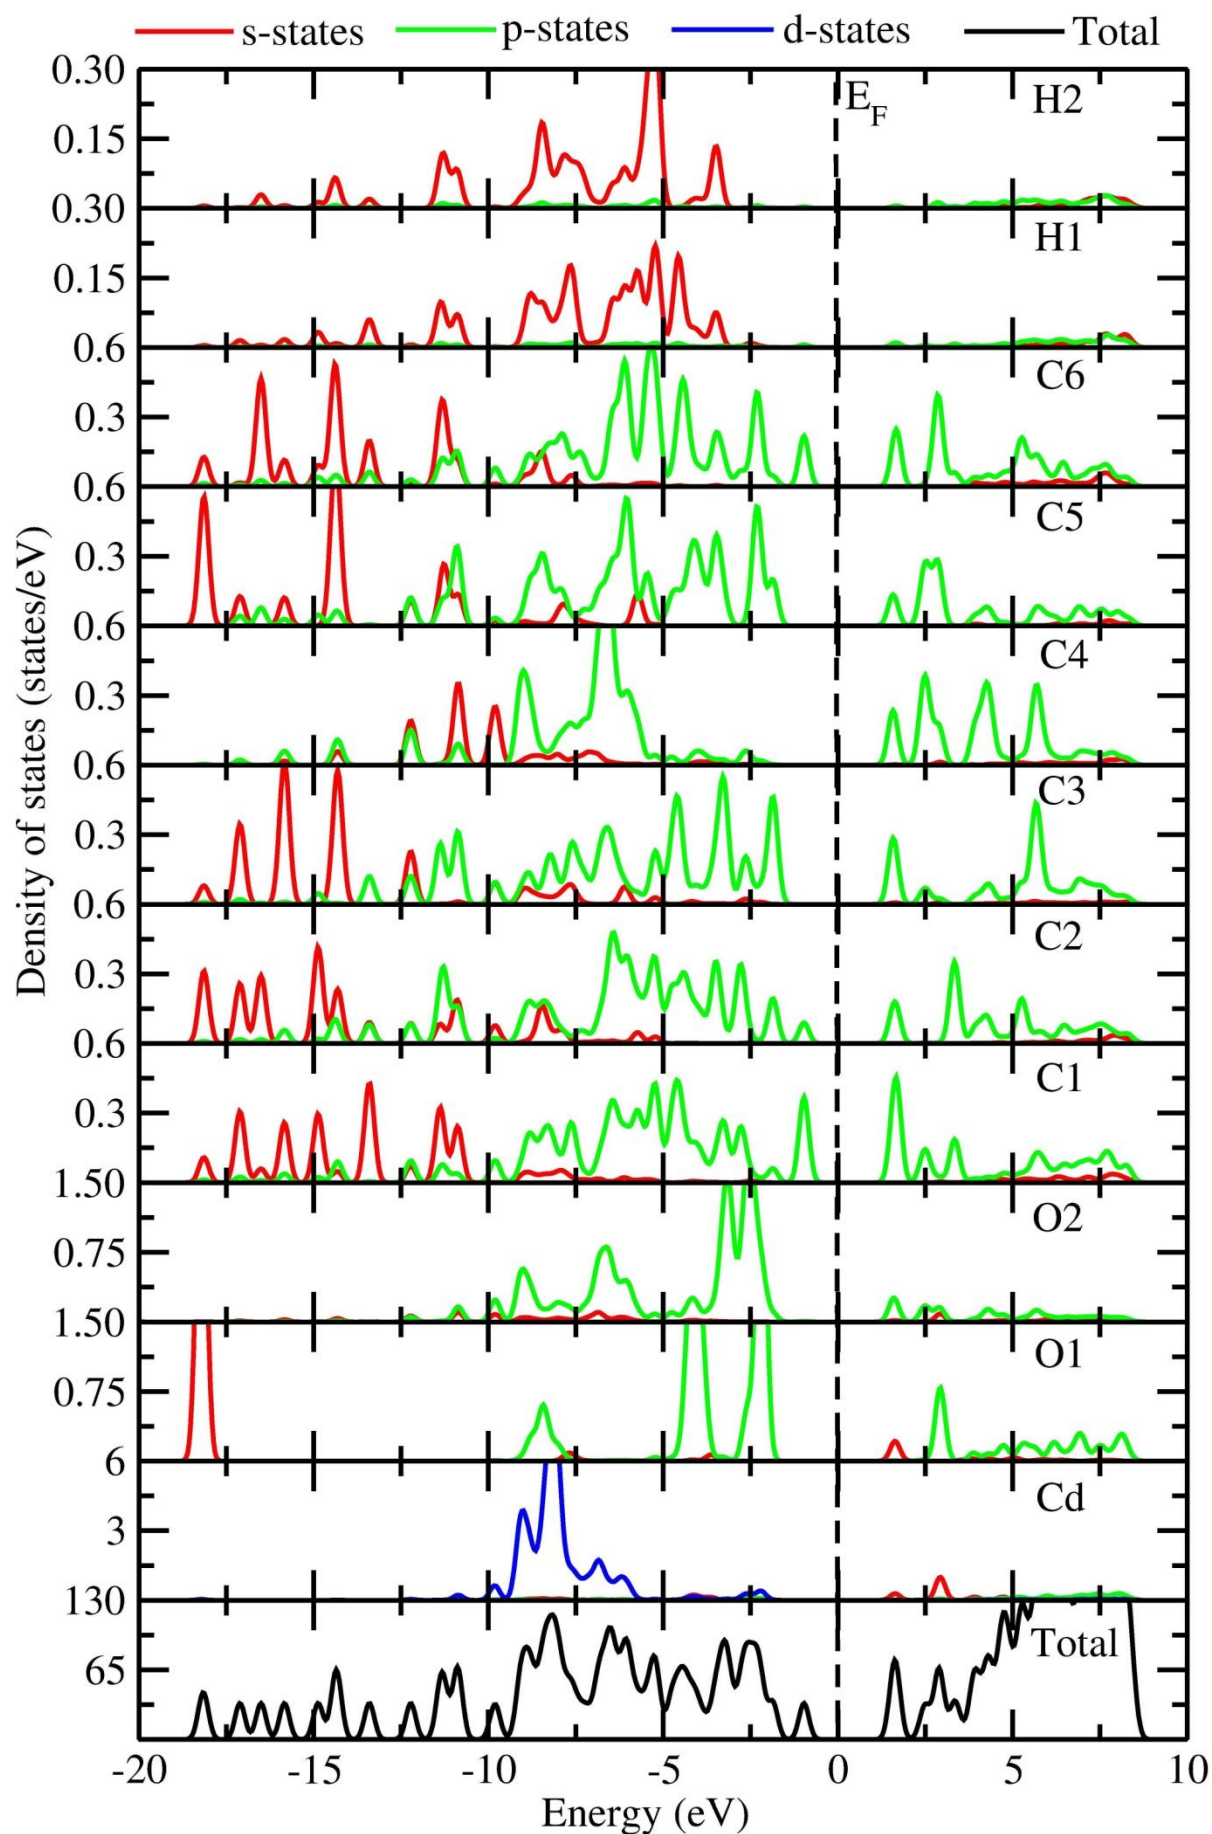

**Figure S8.** The calculated total density of states (TDOS) and partial density of states (PDOS) for Cd-IRMOF-14 in the cubic  $Fm-3m$  symmetry (no. 225)

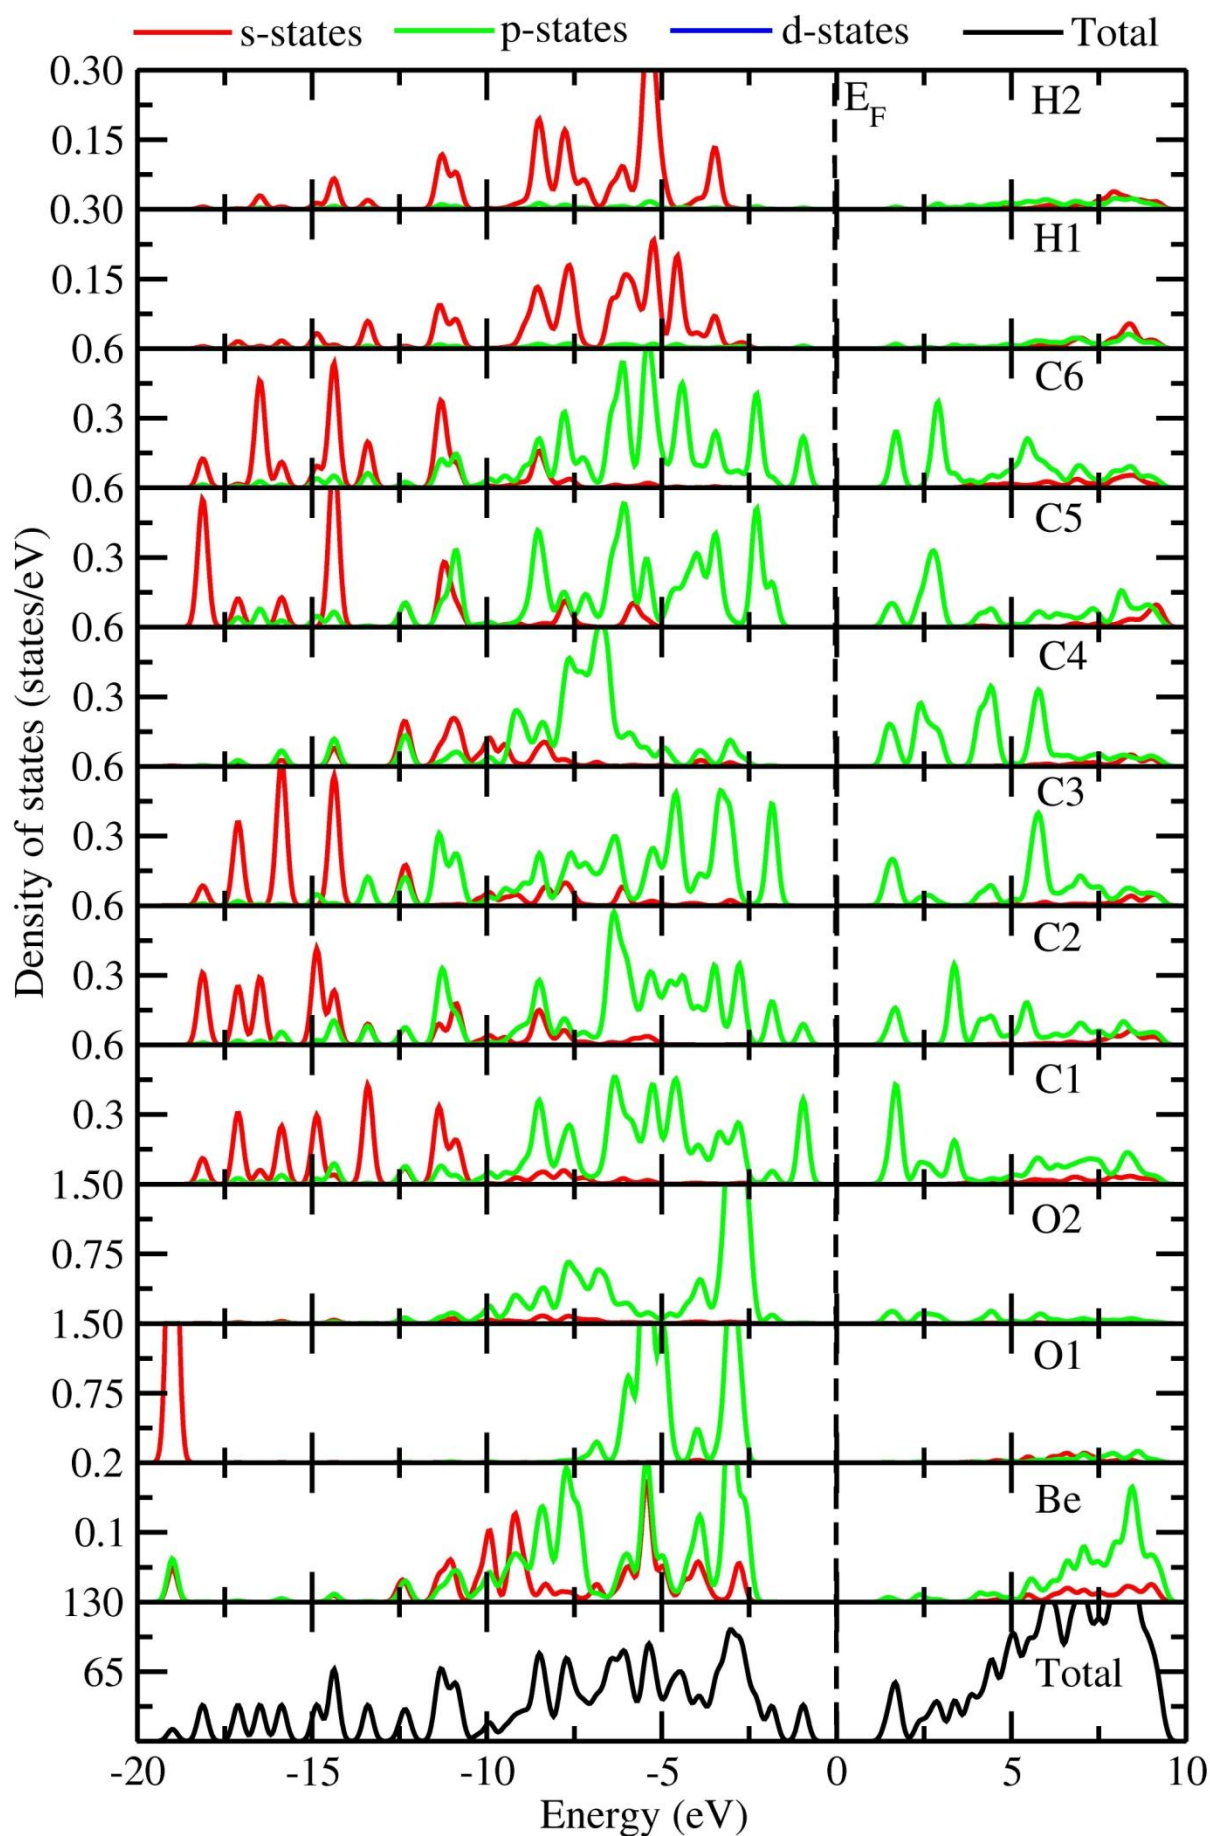

**Figure S9.** The calculated total density of states (TDOS) and partial density of states (PDOS) for Be-IRMOF-14 in the cubic  $Fm-3m$  symmetry (no. 225)

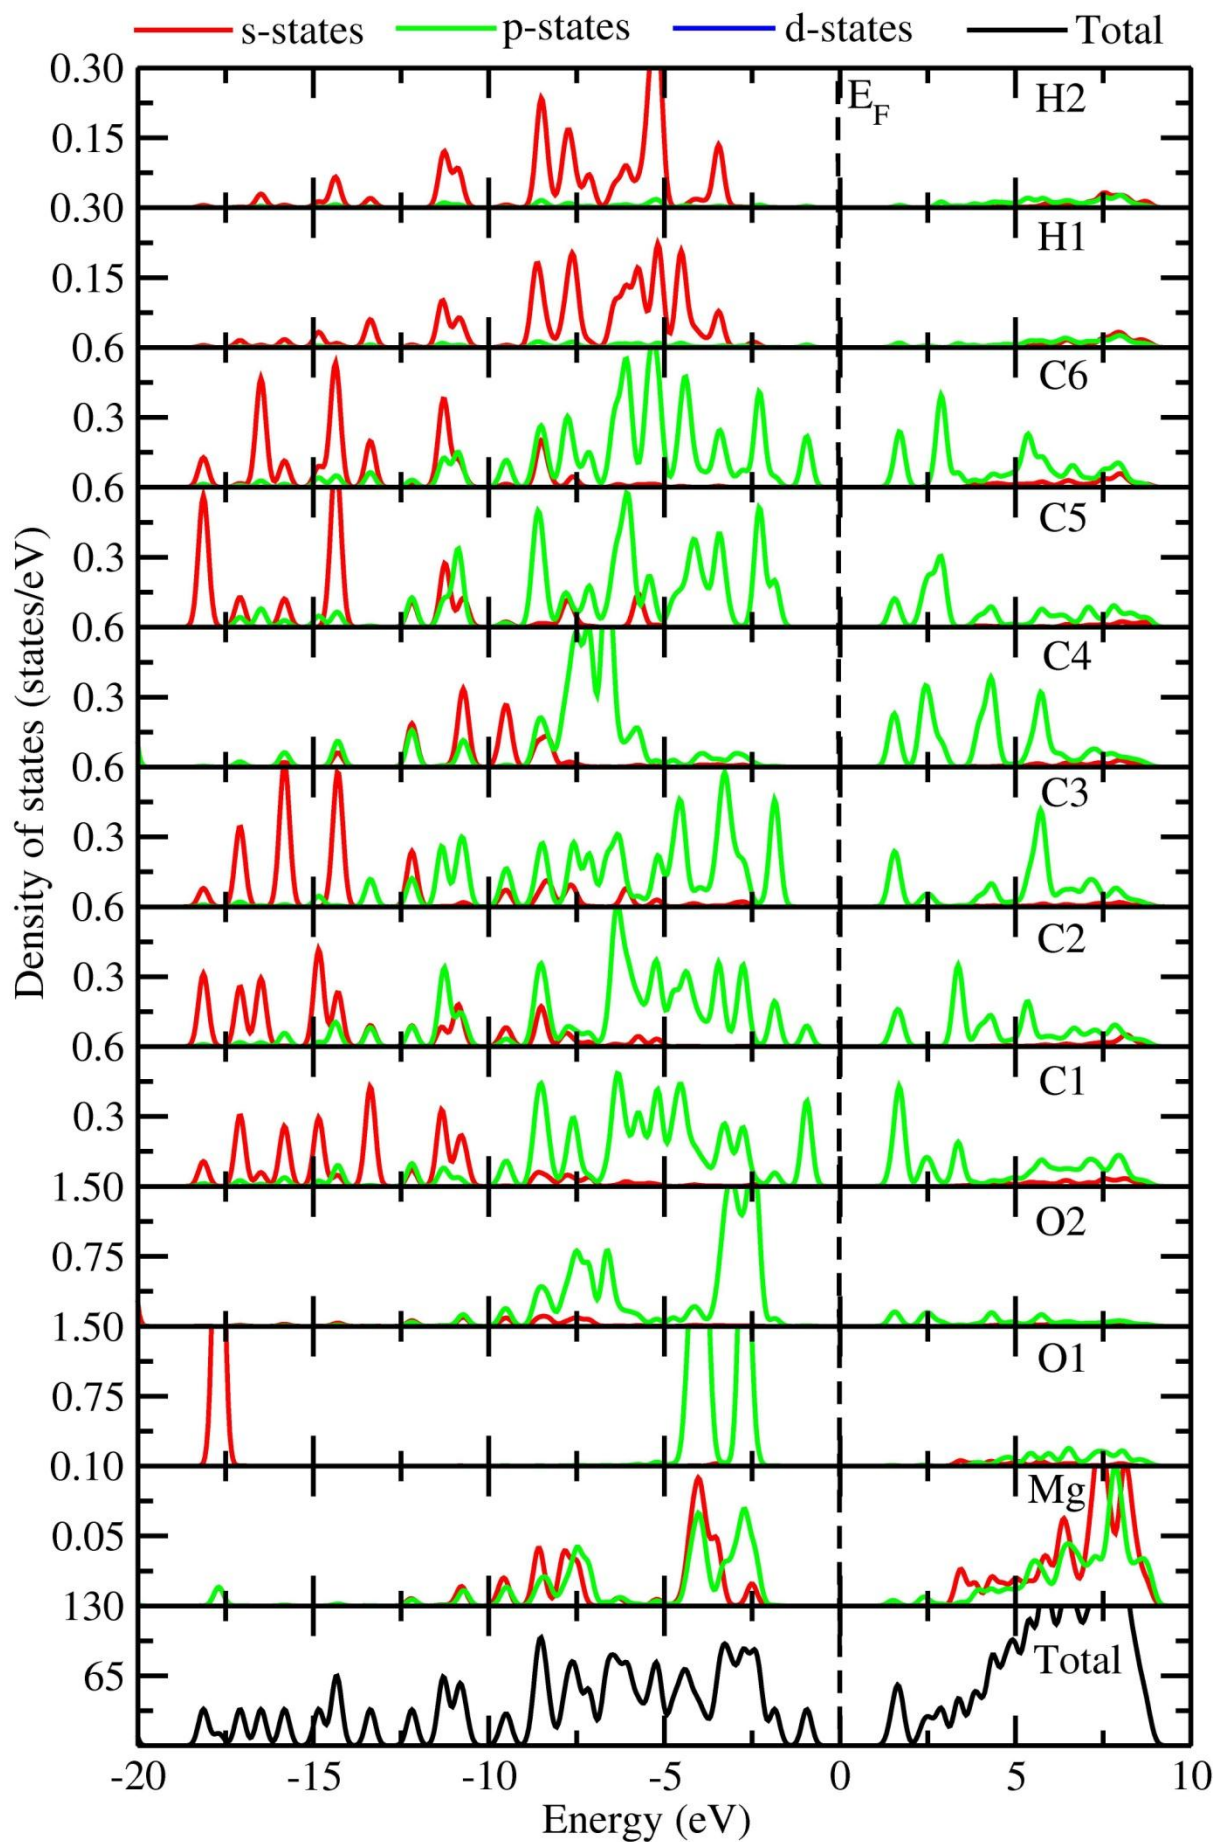

**Figure S10.** The calculated total density of states (TDOS) and partial density of states (PDOS) for Mg-IRMOF-14 in the cubic  $Fm-3m$  symmetry (no. 225)

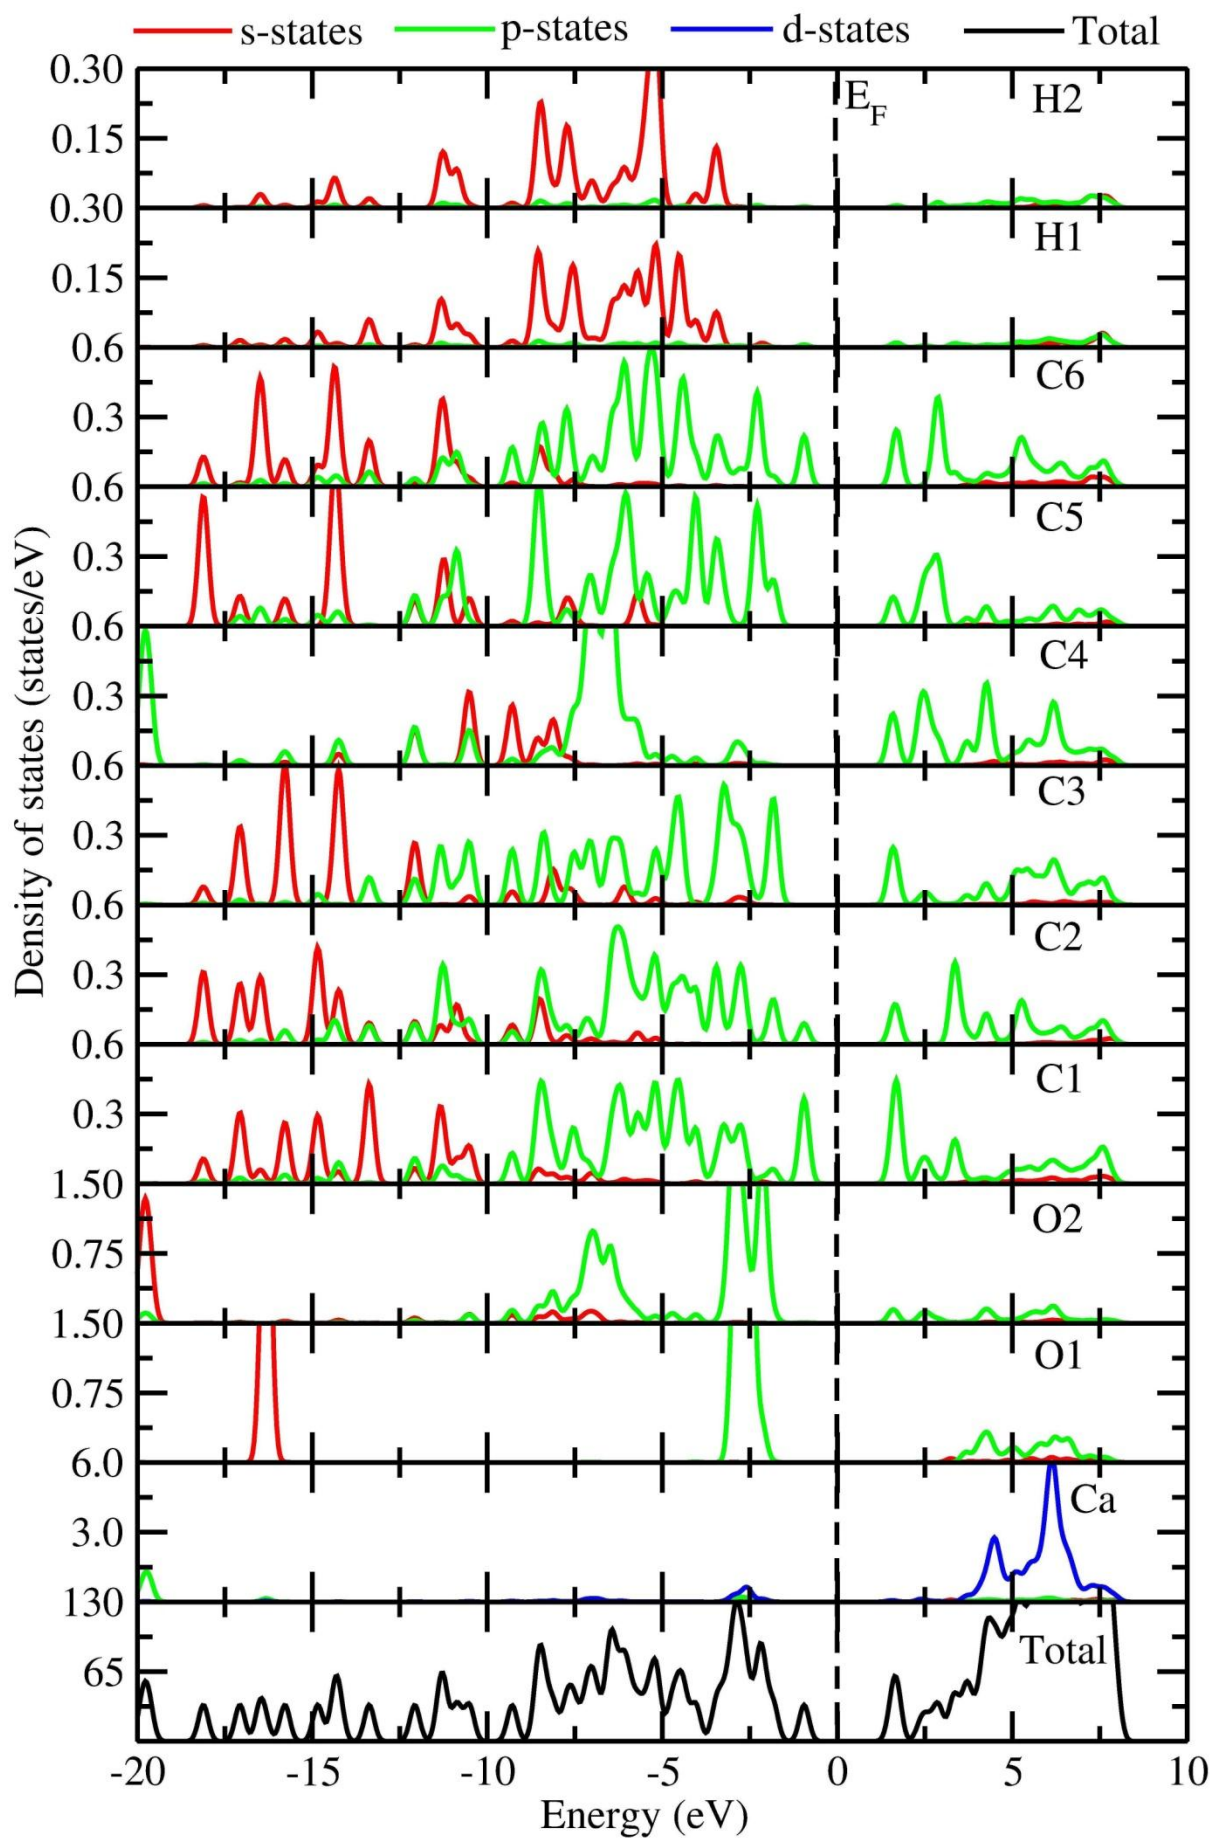

**Figure S11.** The calculated total density of states (TDOS) and partial density of states (PDOS) for Ca-IRMOF-14 in the cubic  $Fm-3m$  symmetry (no. 225)

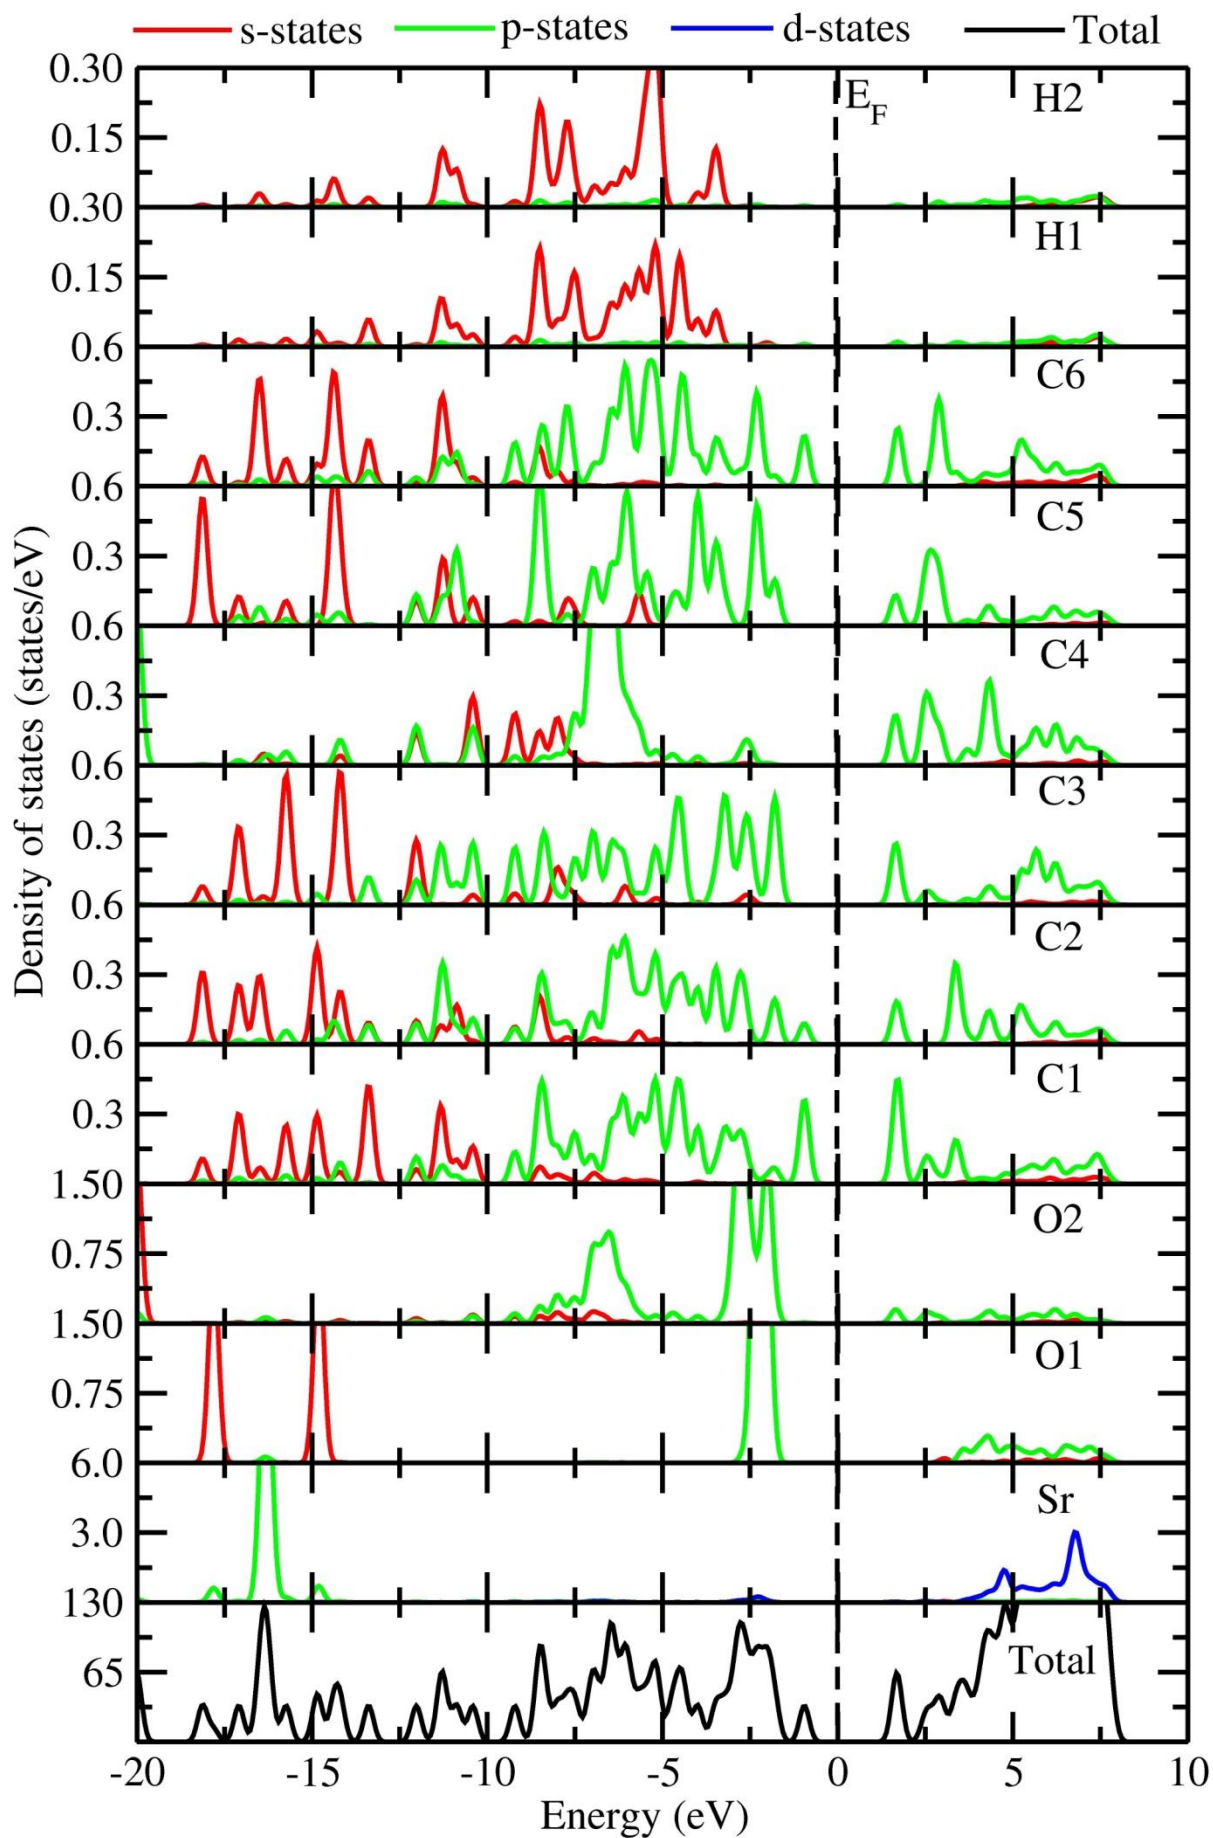

**Figure S12.** The calculated total density of states (TDOS) and partial density of states (PDOS) for Sr-IRMOF-14 in the cubic  $Fm-3m$  symmetry (no. 225)

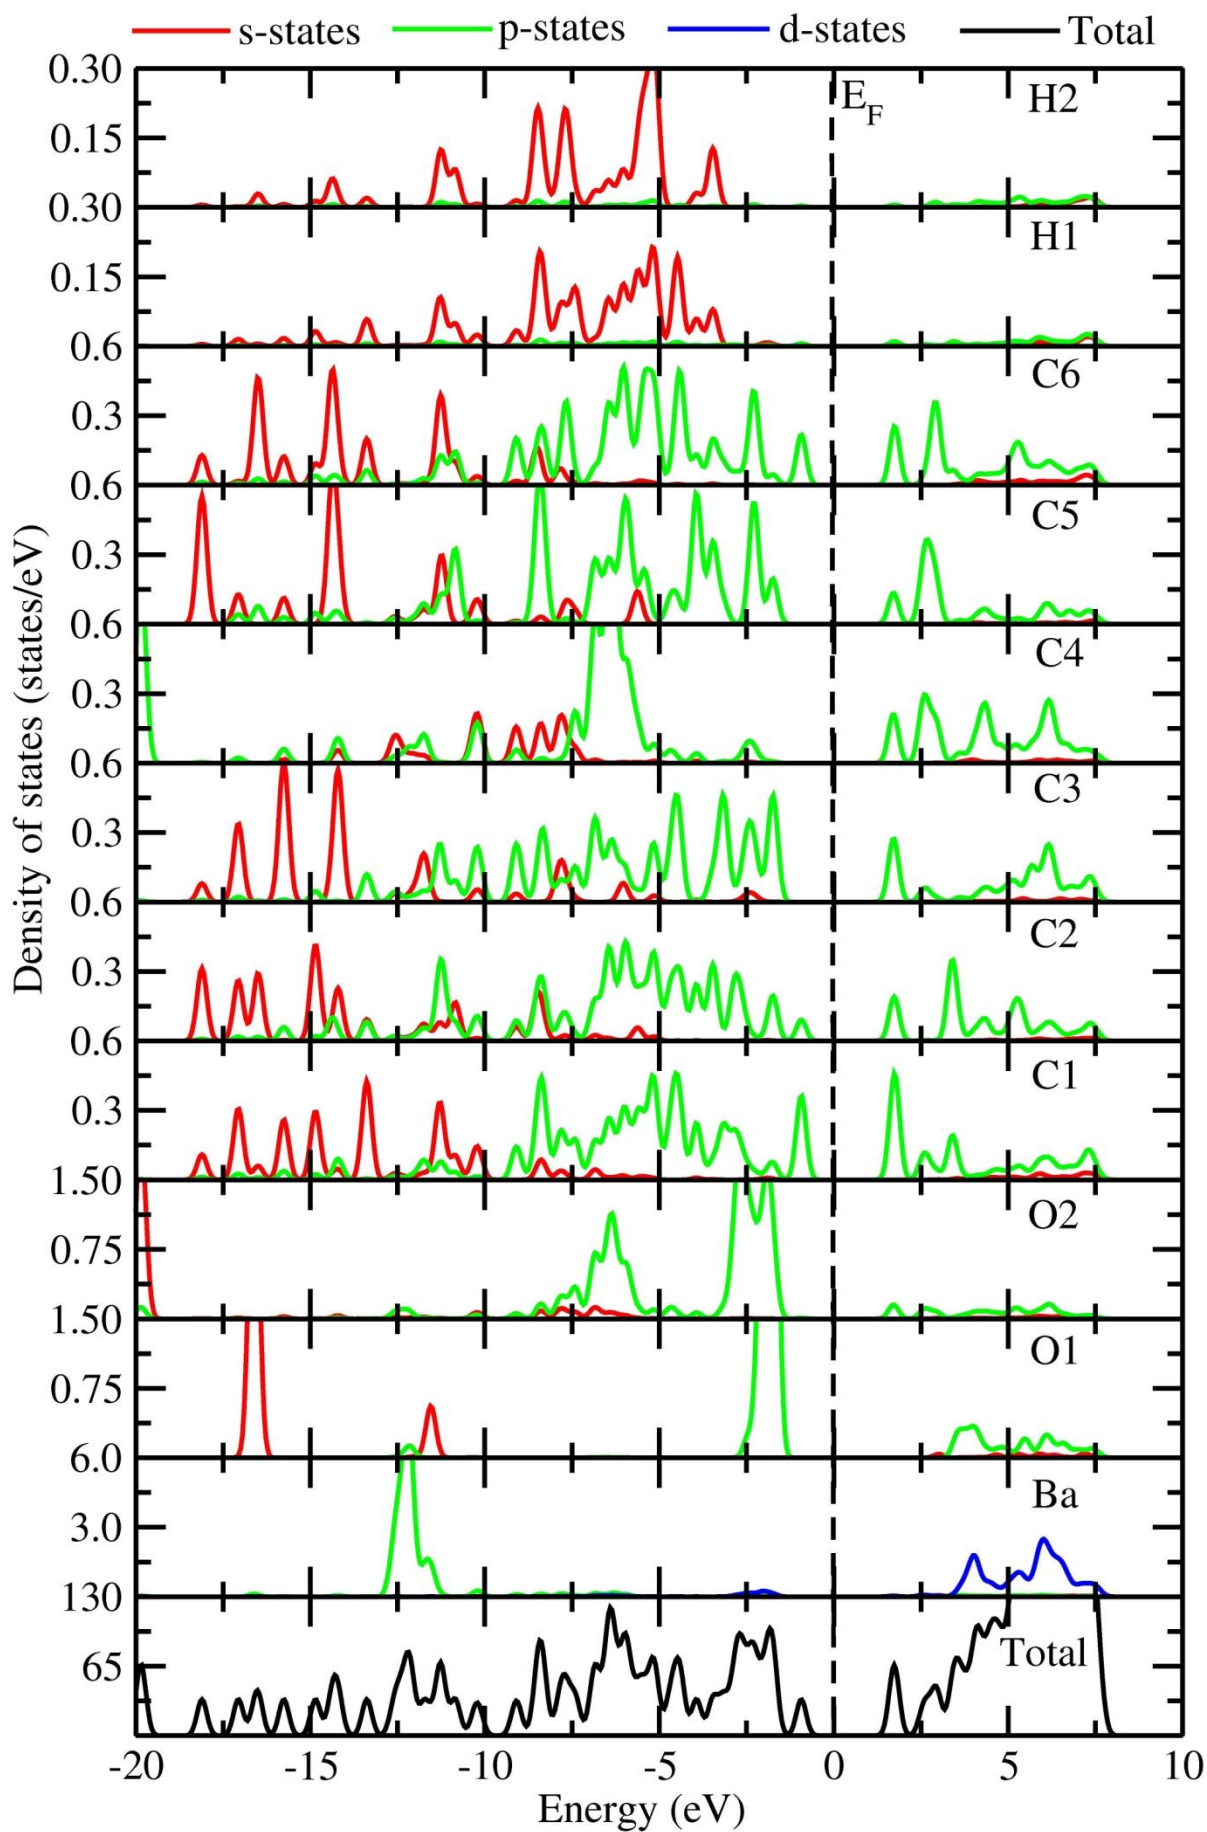

**Figure S13.** The calculated total density of states (TDOS) and partial density of states (PDOS) for Ba-IRMOF-14 in the cubic  $Fm-3m$  symmetry (no. 225)

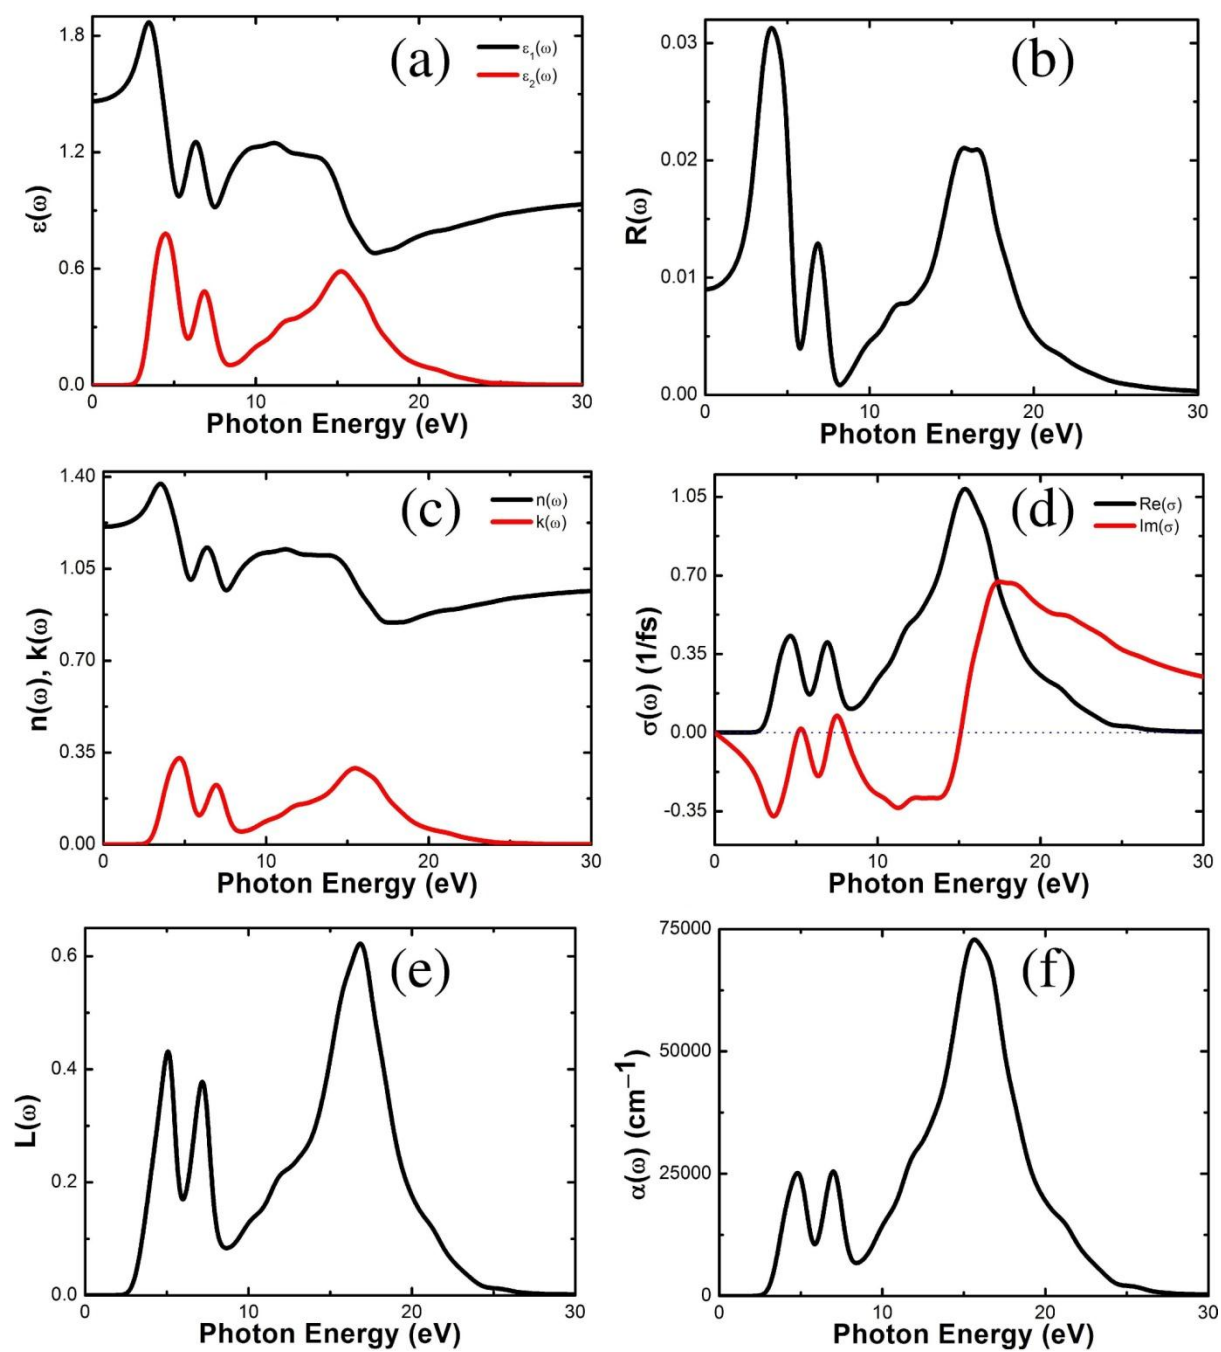

**Figure S14.** Calculated optical properties for Cd-IRMOF-14: (a) dielectric function  $\epsilon(\omega)$ , (b) reflectivity  $R(\omega)$ , (c) refractive index  $n(\omega)$ ; extinction coefficient  $k(\omega)$ , (d) optical conductivity  $\sigma(\omega)$ , (e) energy loss function  $L(\omega)$ , (f) absorption  $\alpha(\omega)$ .

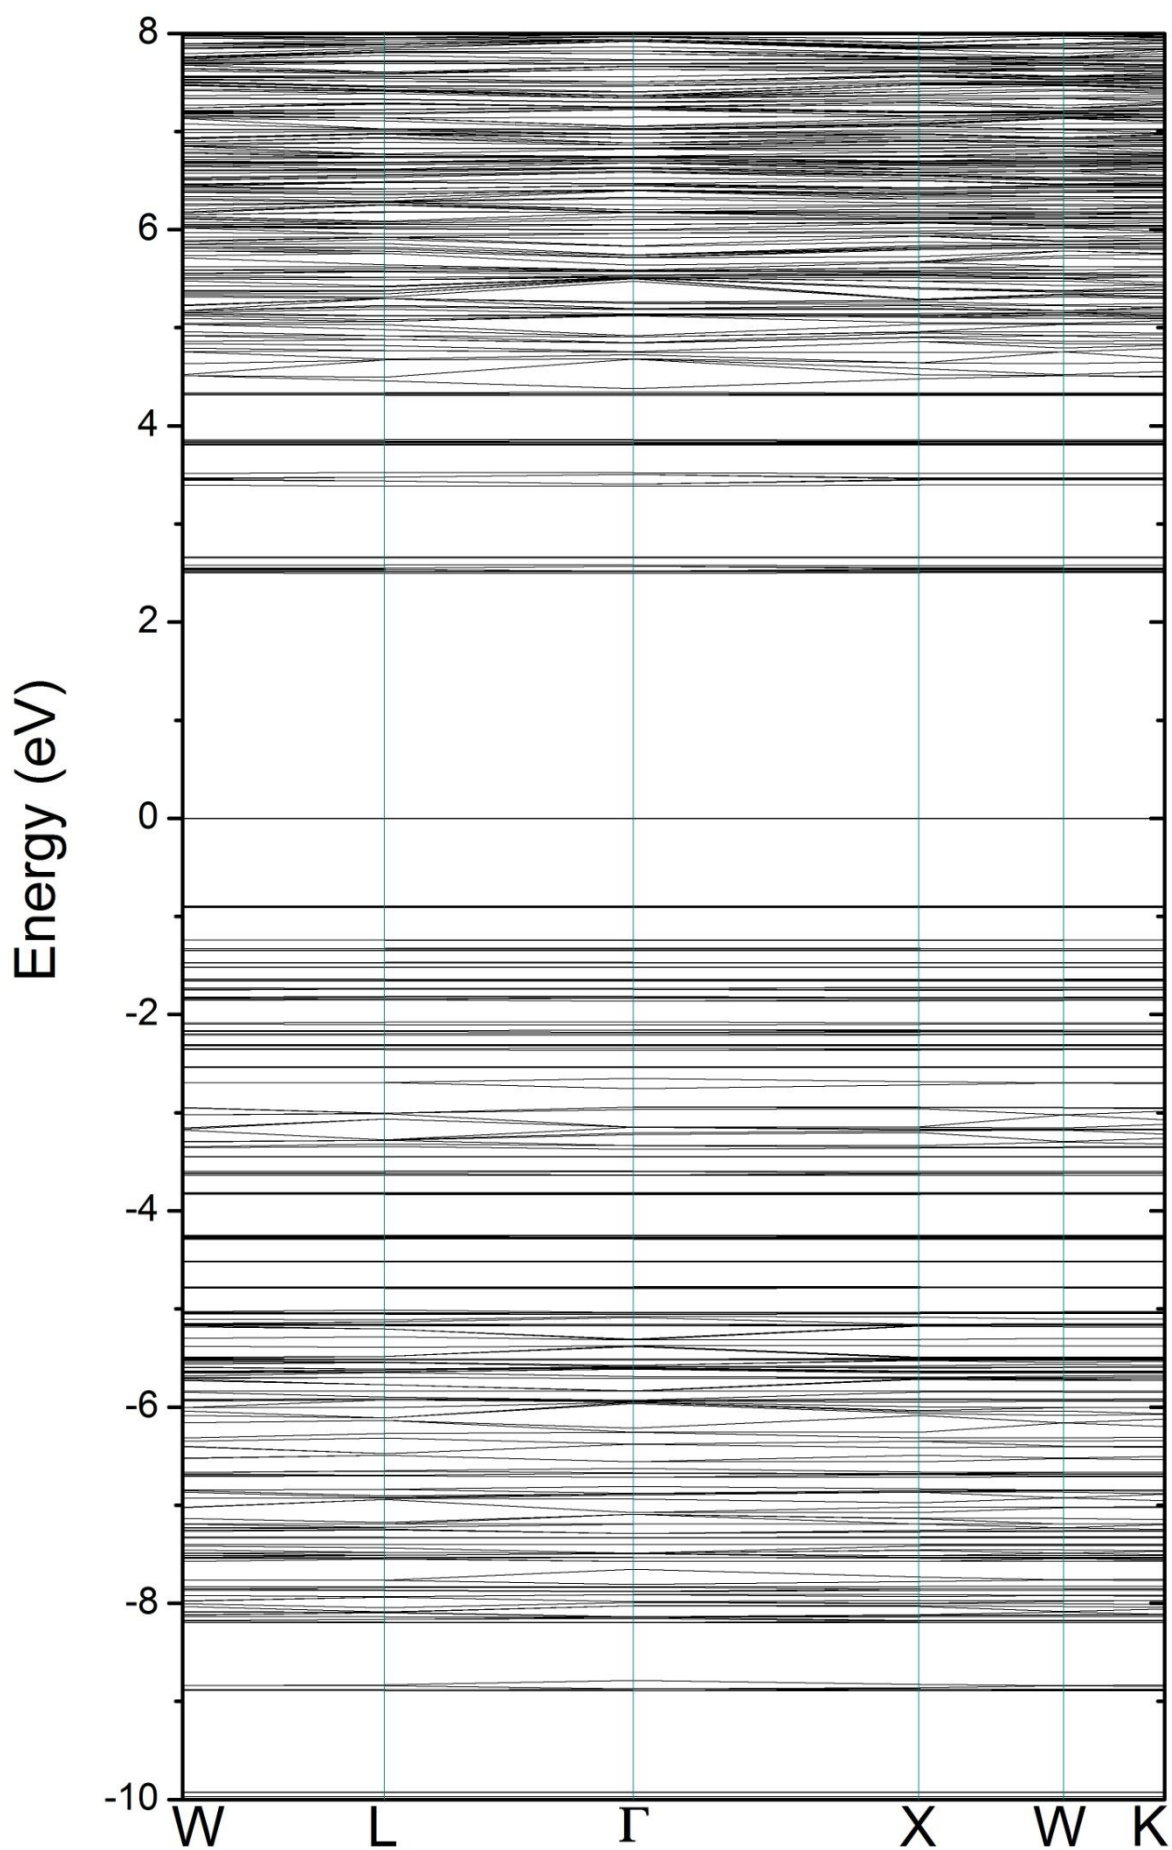

**Figure S15.** The electronic band structure of Cd-IRMOF-14. The Fermi level is set to zero and placed in the valence band maximum.



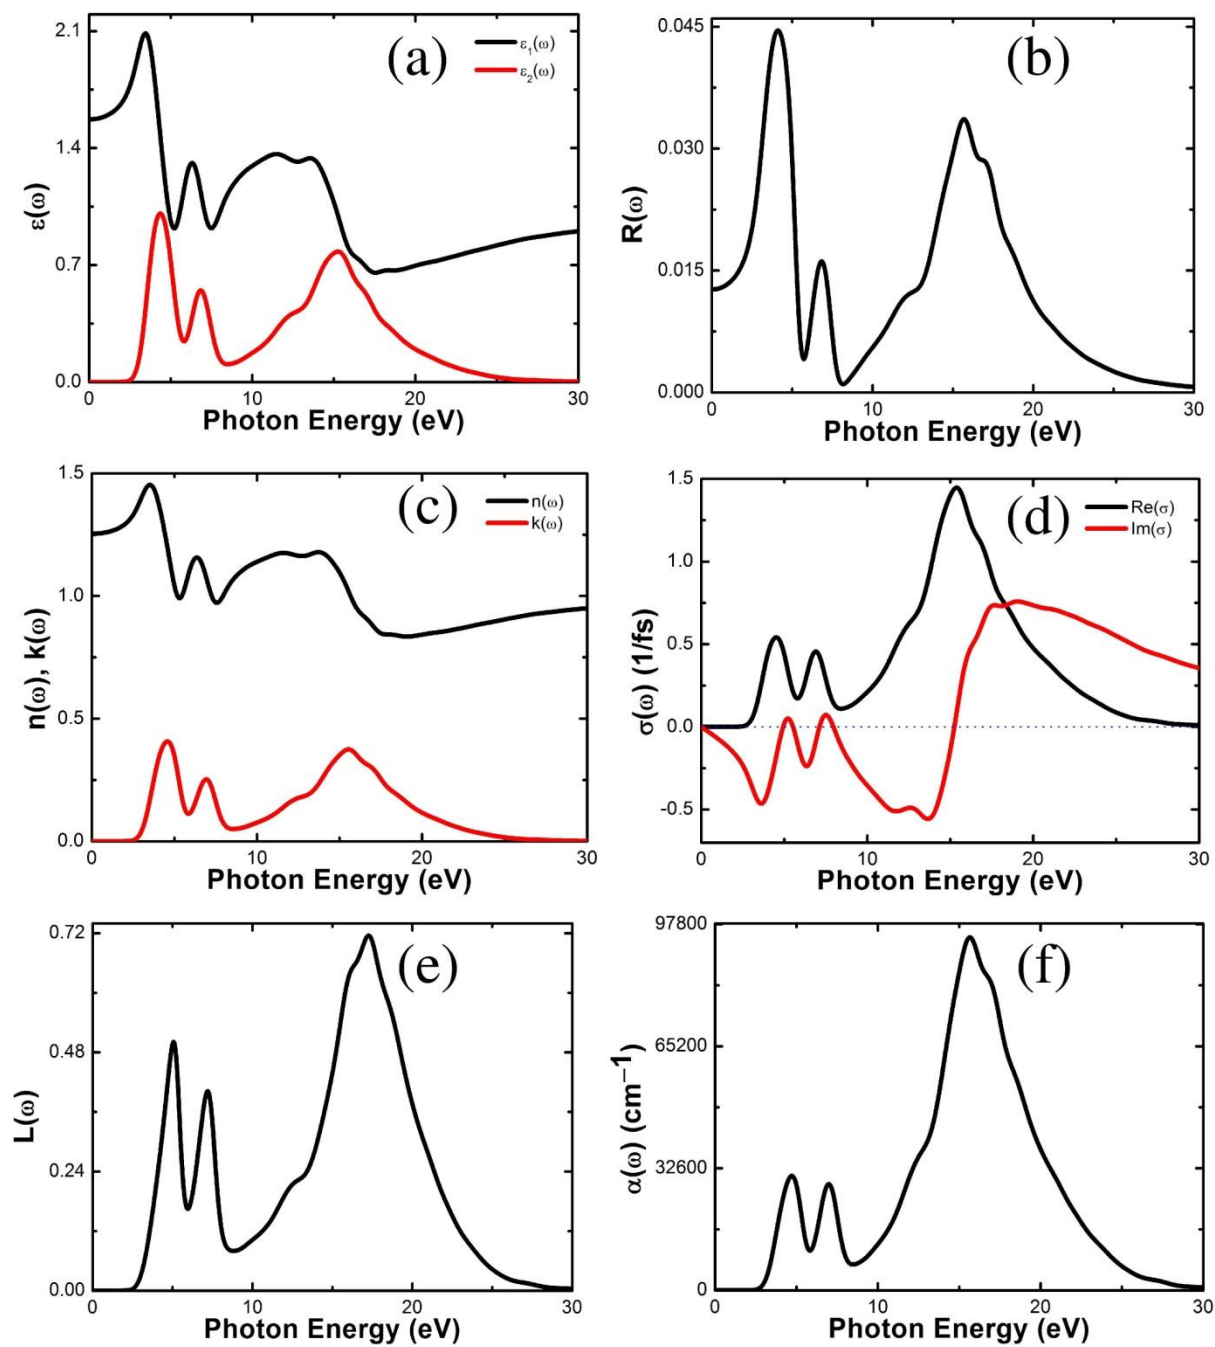

**Figure S16.** Calculated optical properties for Be-IRMOF-14: (a) dielectric function  $\epsilon(\omega)$ , (b) reflectivity  $R(\omega)$ , (c) refractive index  $n(\omega)$ ; extinction coefficient  $k(\omega)$ , (d) optical conductivity  $\sigma(\omega)$ , (e) energy loss function  $L(\omega)$ , (f) absorption  $\alpha(\omega)$ .

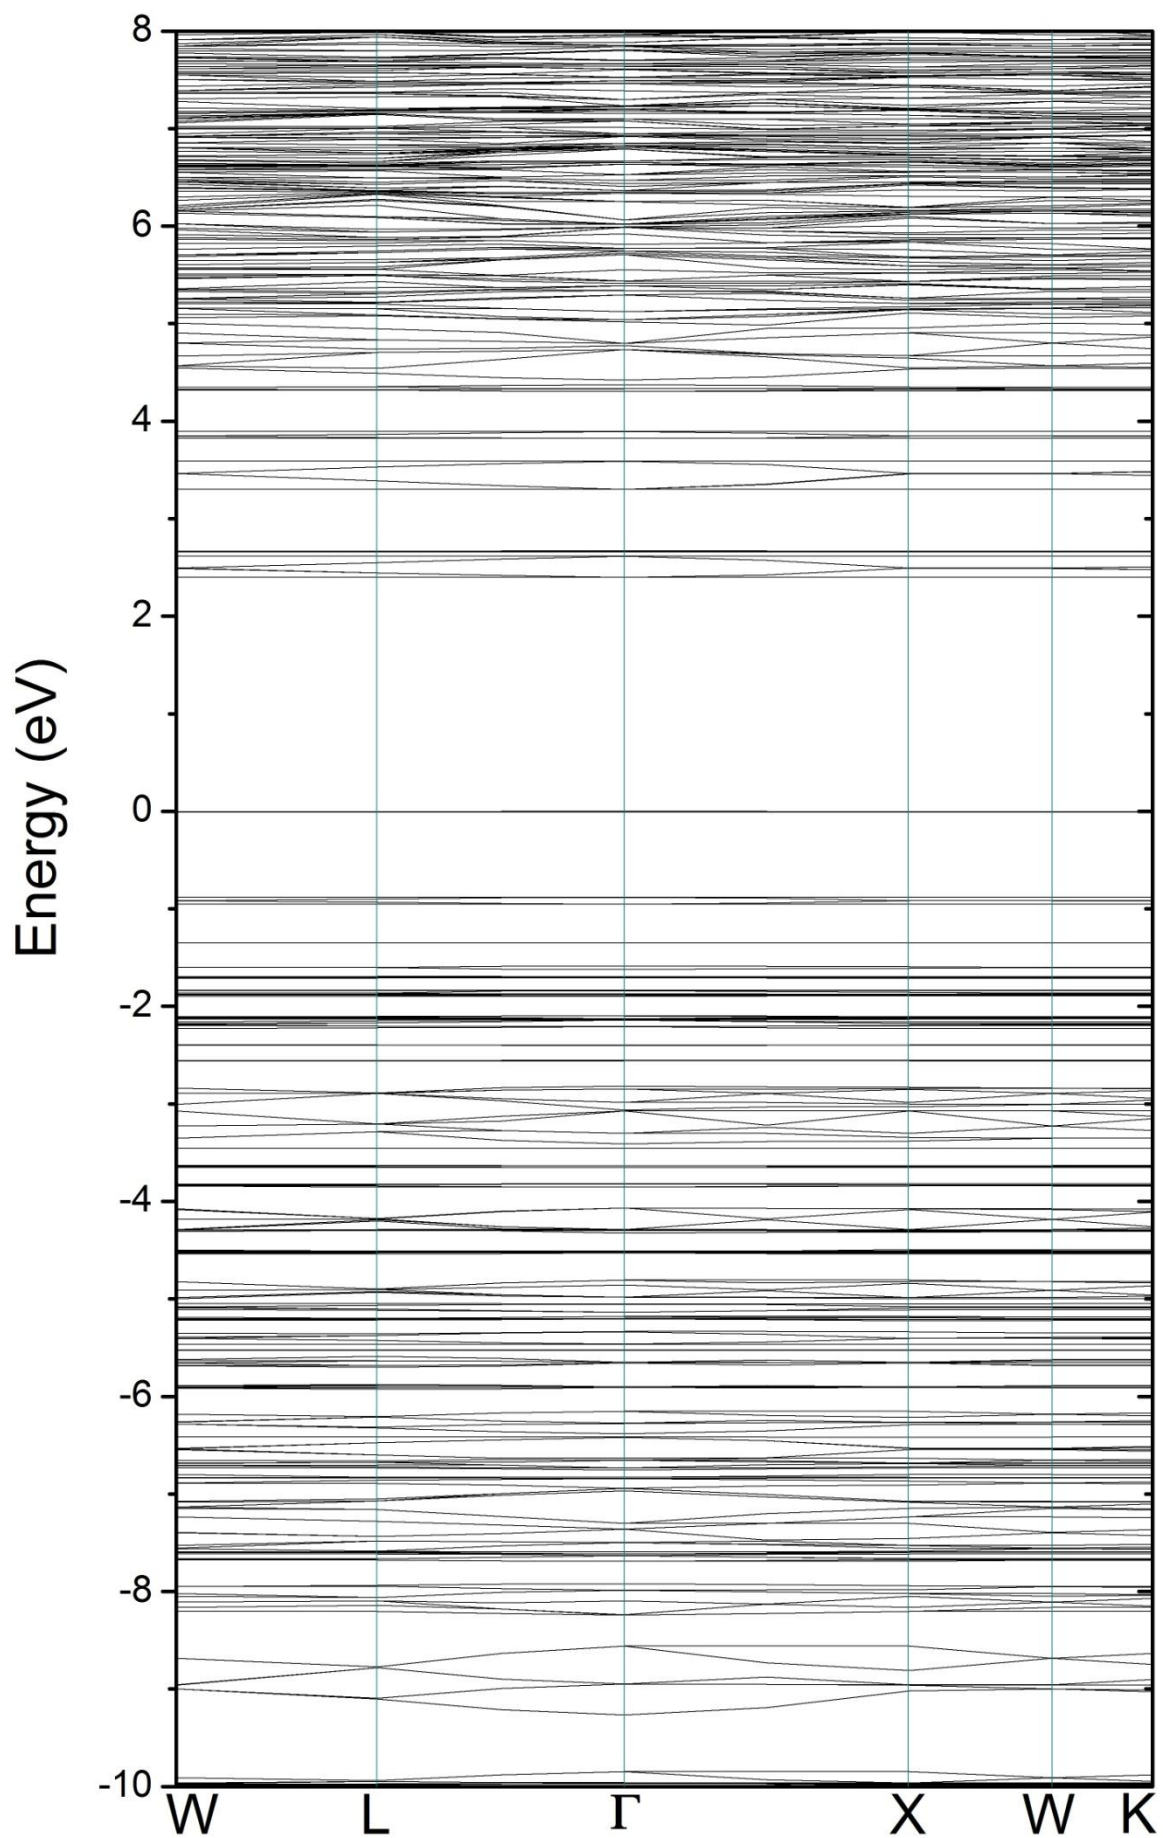

**Figure S17.** The electronic band structure of Be-IRMOF-14. The Fermi level is set to zero and placed in the valence band maximum.

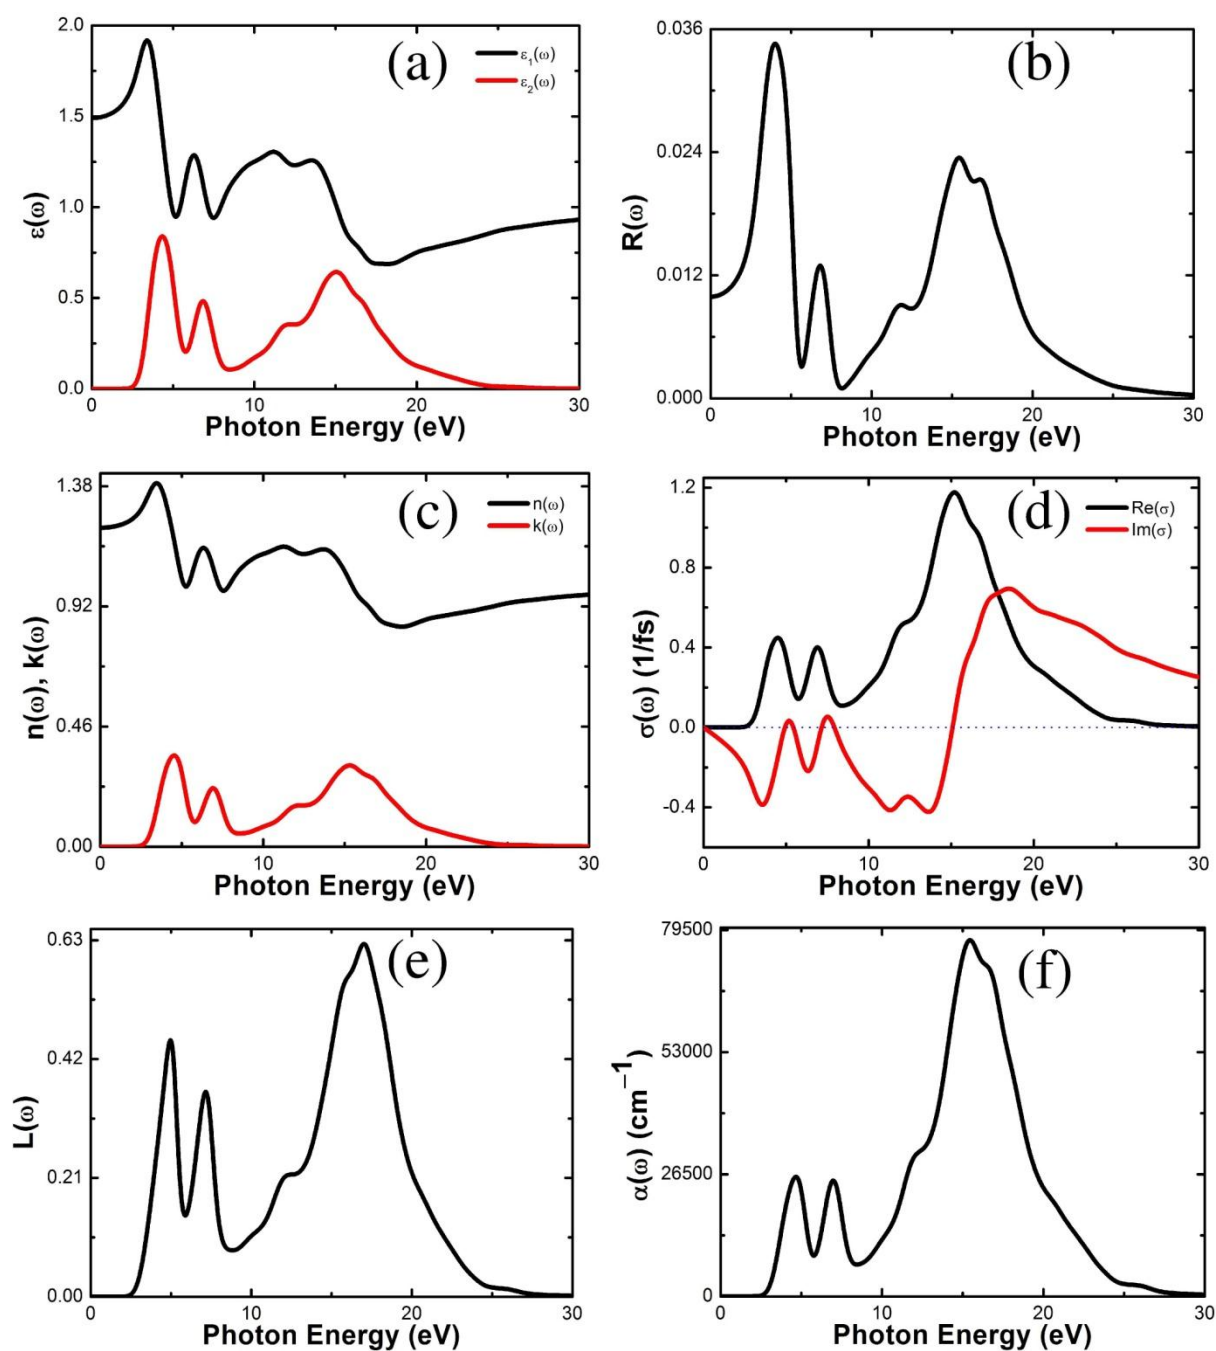

**Figure S18.** Calculated optical properties for Mg-IRMOF-14: (a) dielectric function  $\epsilon(\omega)$ , (b) reflectivity  $R(\omega)$ , (c) refractive index  $n(\omega)$ ; extinction coefficient  $k(\omega)$ , (d) optical conductivity  $\sigma(\omega)$ , (e) energy loss function  $L(\omega)$ , (f) absorption  $\alpha(\omega)$ .

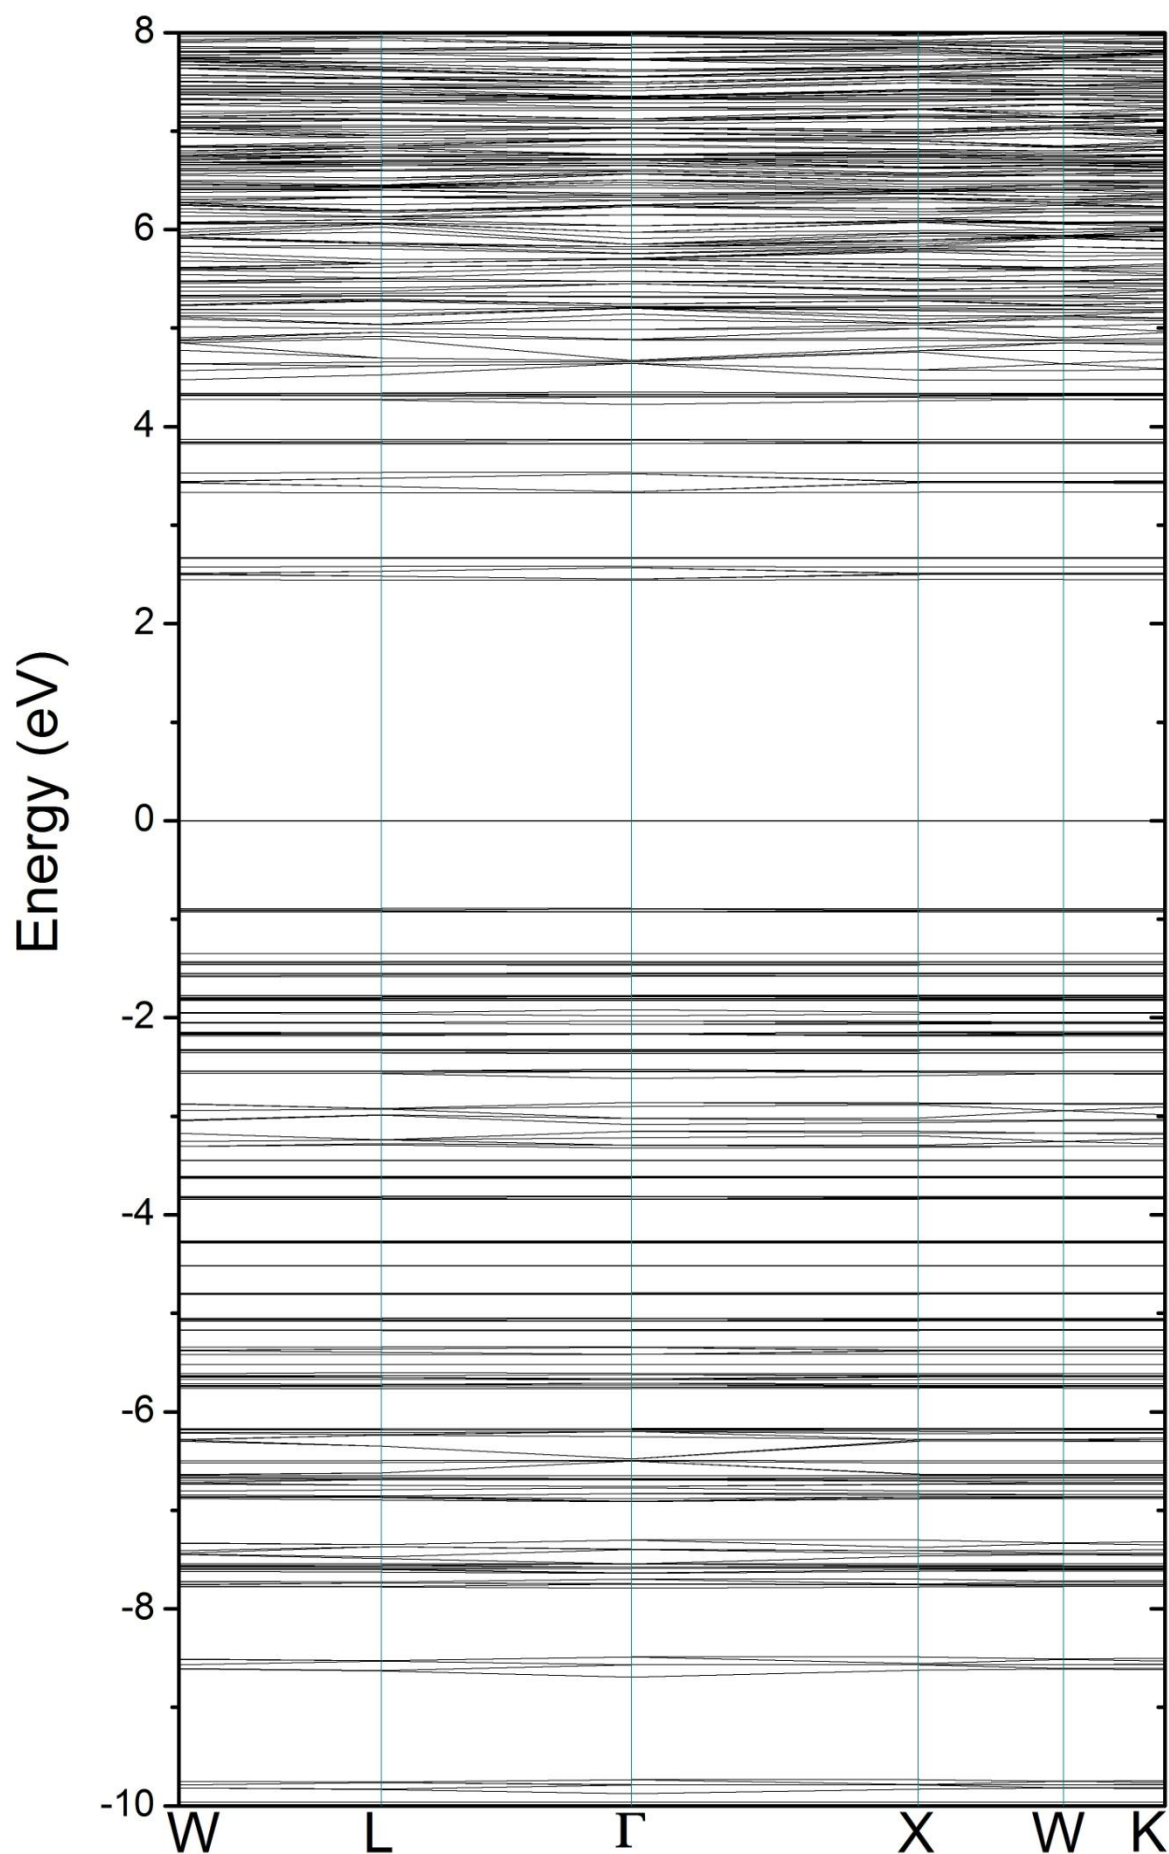

**Figure S19.** The electronic band structure of Mg-IRMOF-14. The Fermi level is set to zero and placed in the valence band maximum.

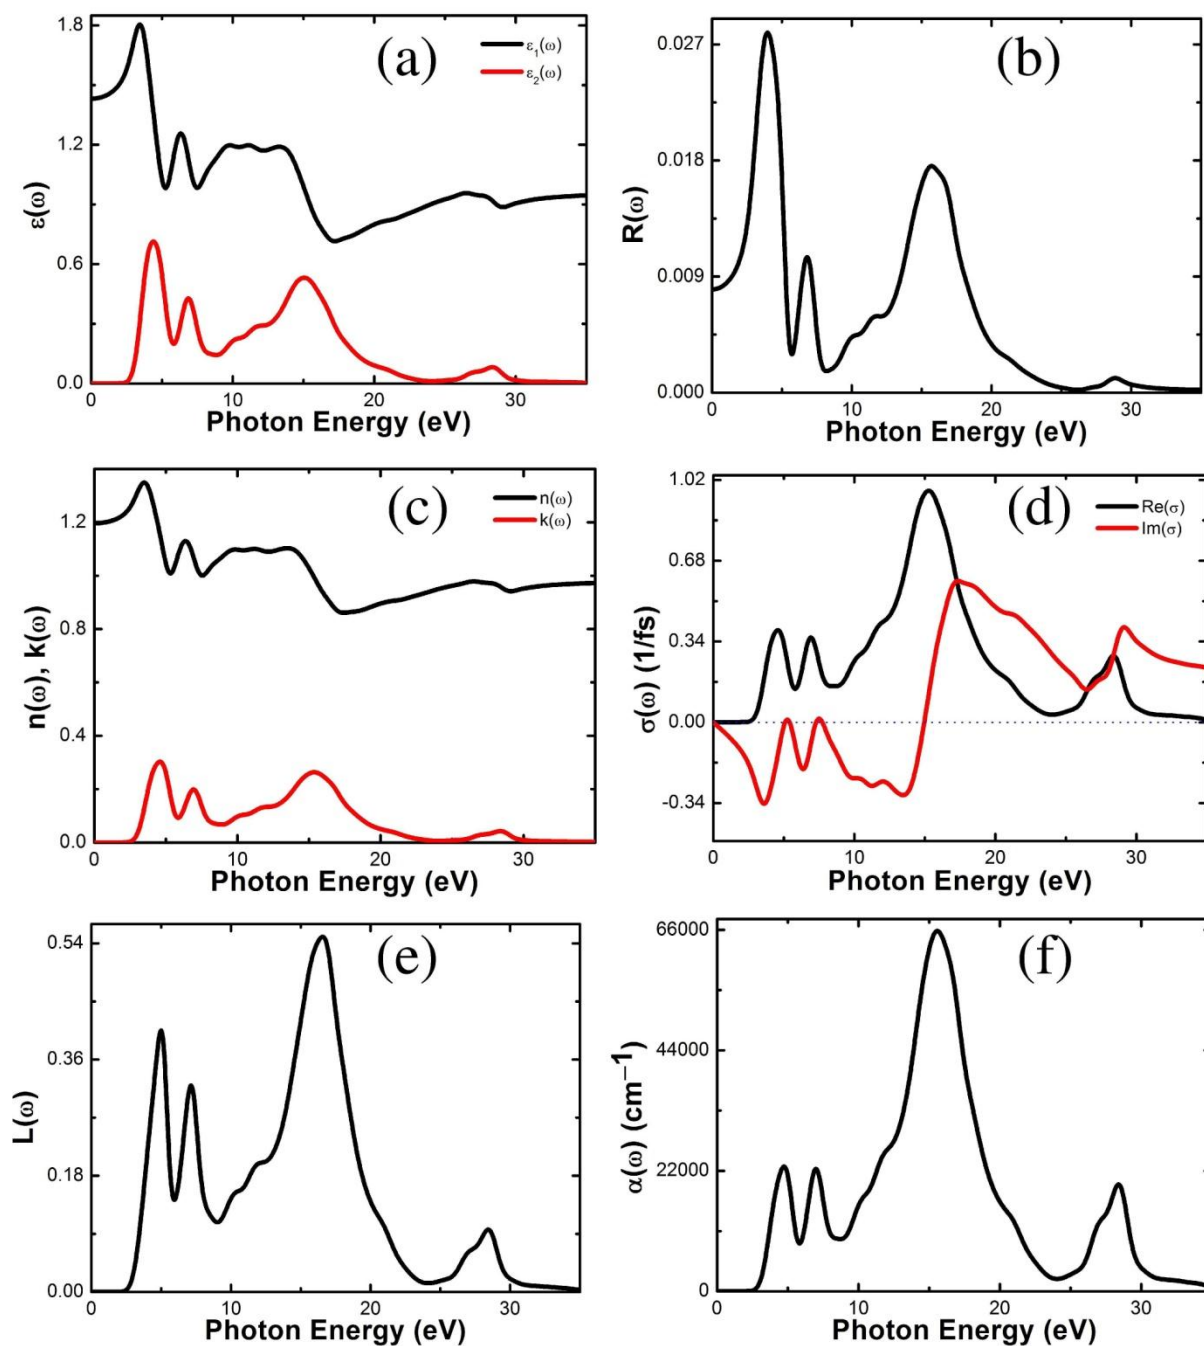

**Figure S20.** Calculated optical properties for Ca-IRMOF-14: (a) dielectric function  $\epsilon(\omega)$ , (b) reflectivity  $R(\omega)$ , (c) refractive index  $n(\omega)$ ; extinction coefficient  $k(\omega)$ , (d) optical conductivity  $\sigma(\omega)$ , (e) energy loss function  $L(\omega)$ , (f) absorption  $\alpha(\omega)$ .

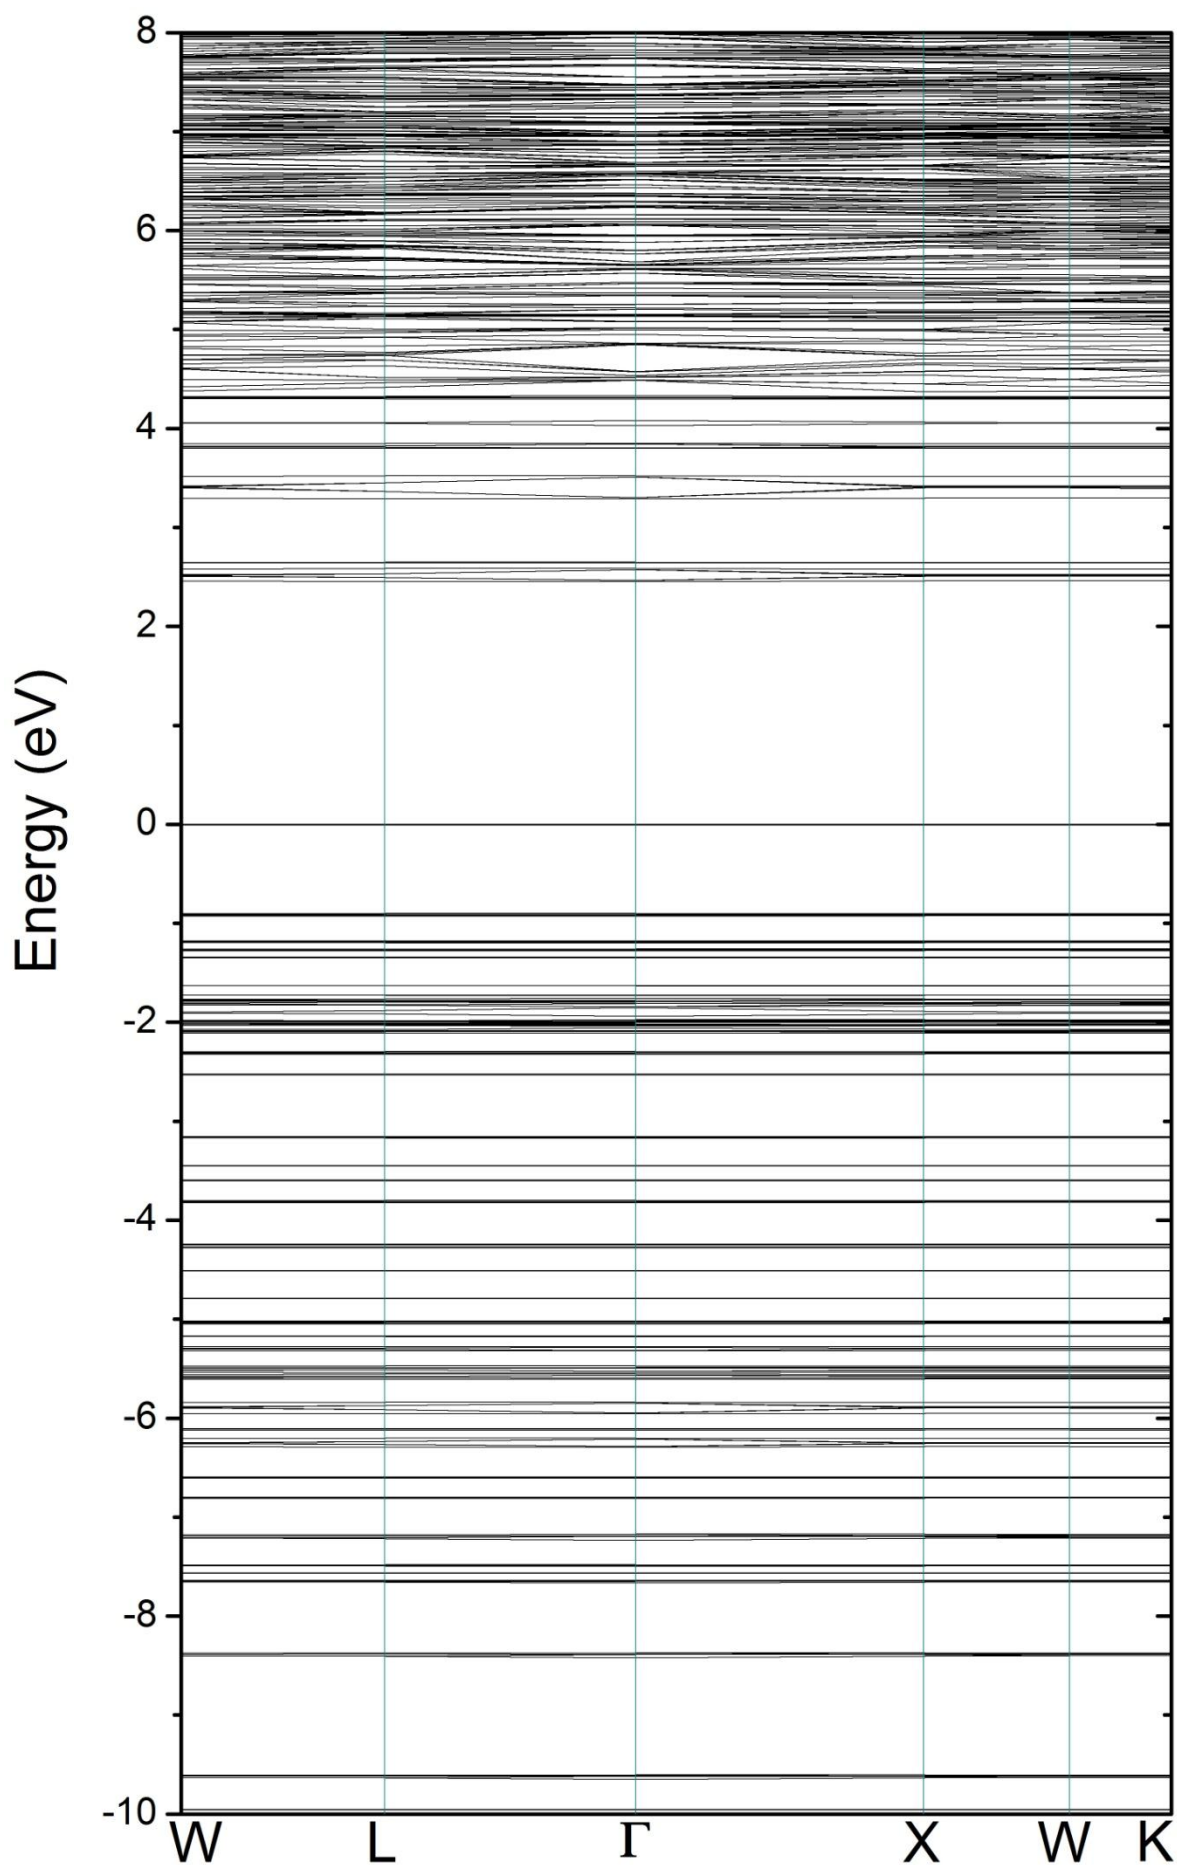

**Figure S21.** The electronic band structure of Ca-IRMOF-14. The Fermi level is set to zero and placed in the valence band maximum.

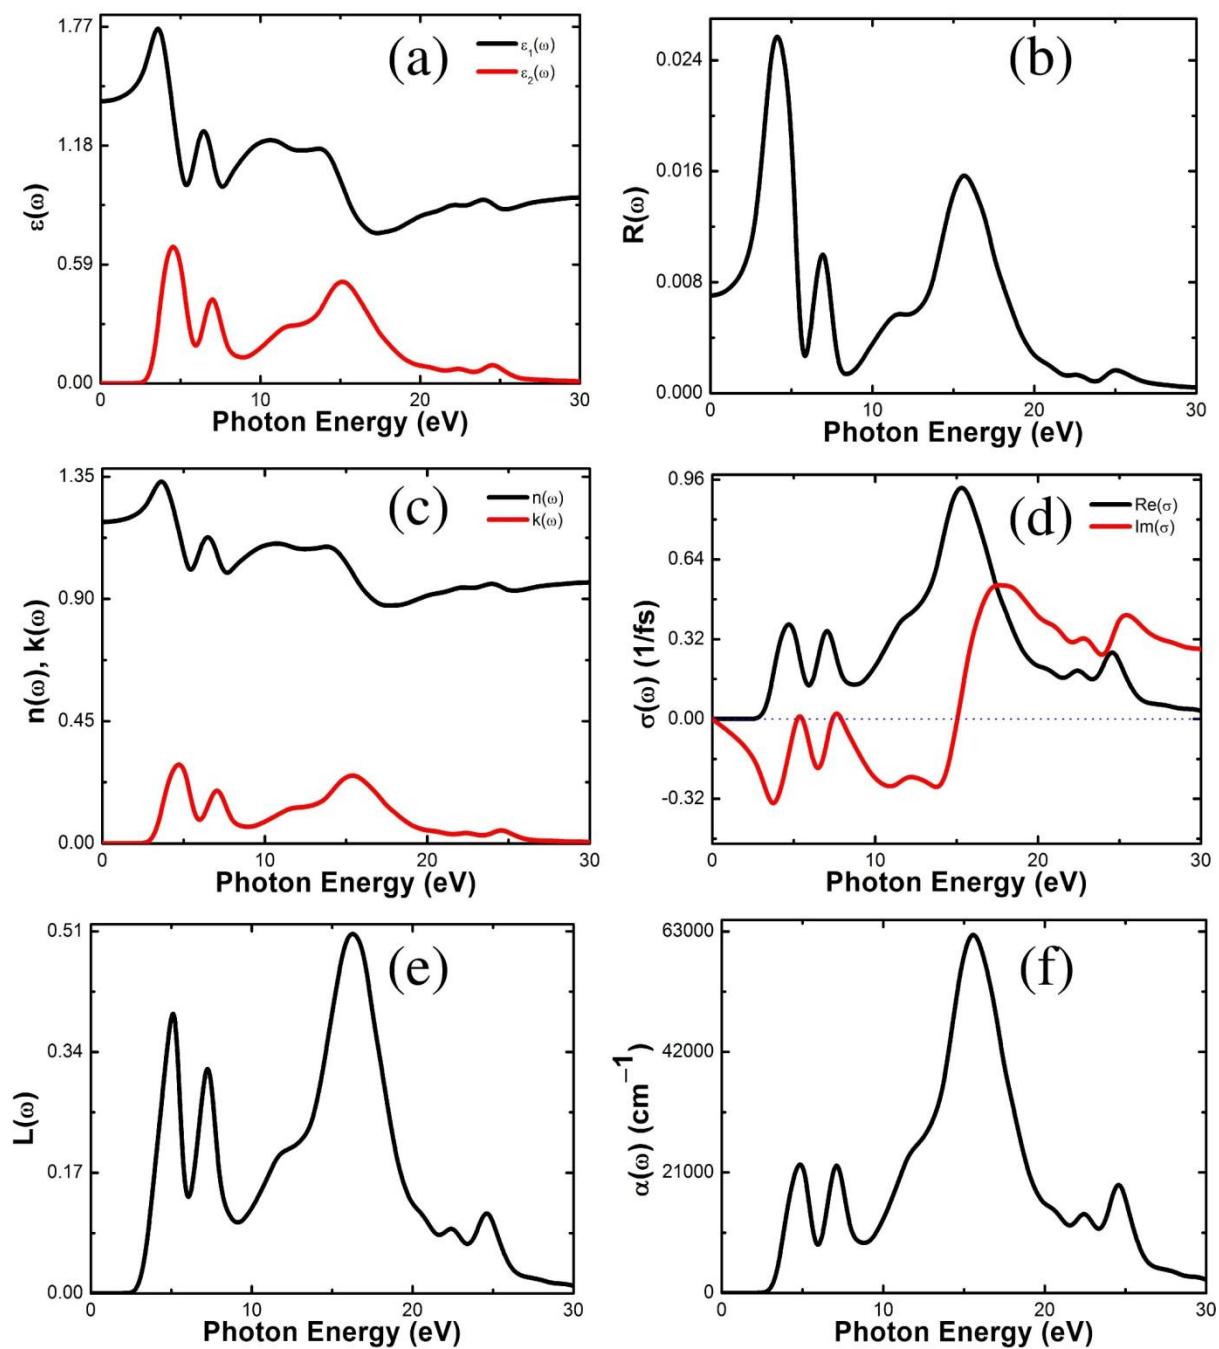

**Figure S22.** Calculated optical properties for Sr-IRMOF-14: (a) dielectric function  $\epsilon(\omega)$ , (b) reflectivity  $R(\omega)$ , (c) refractive index  $n(\omega)$ ; extinction coefficient  $k(\omega)$ , (d) optical conductivity  $\sigma(\omega)$ , (e) energy loss function  $L(\omega)$ , (f) absorption  $\alpha(\omega)$ .

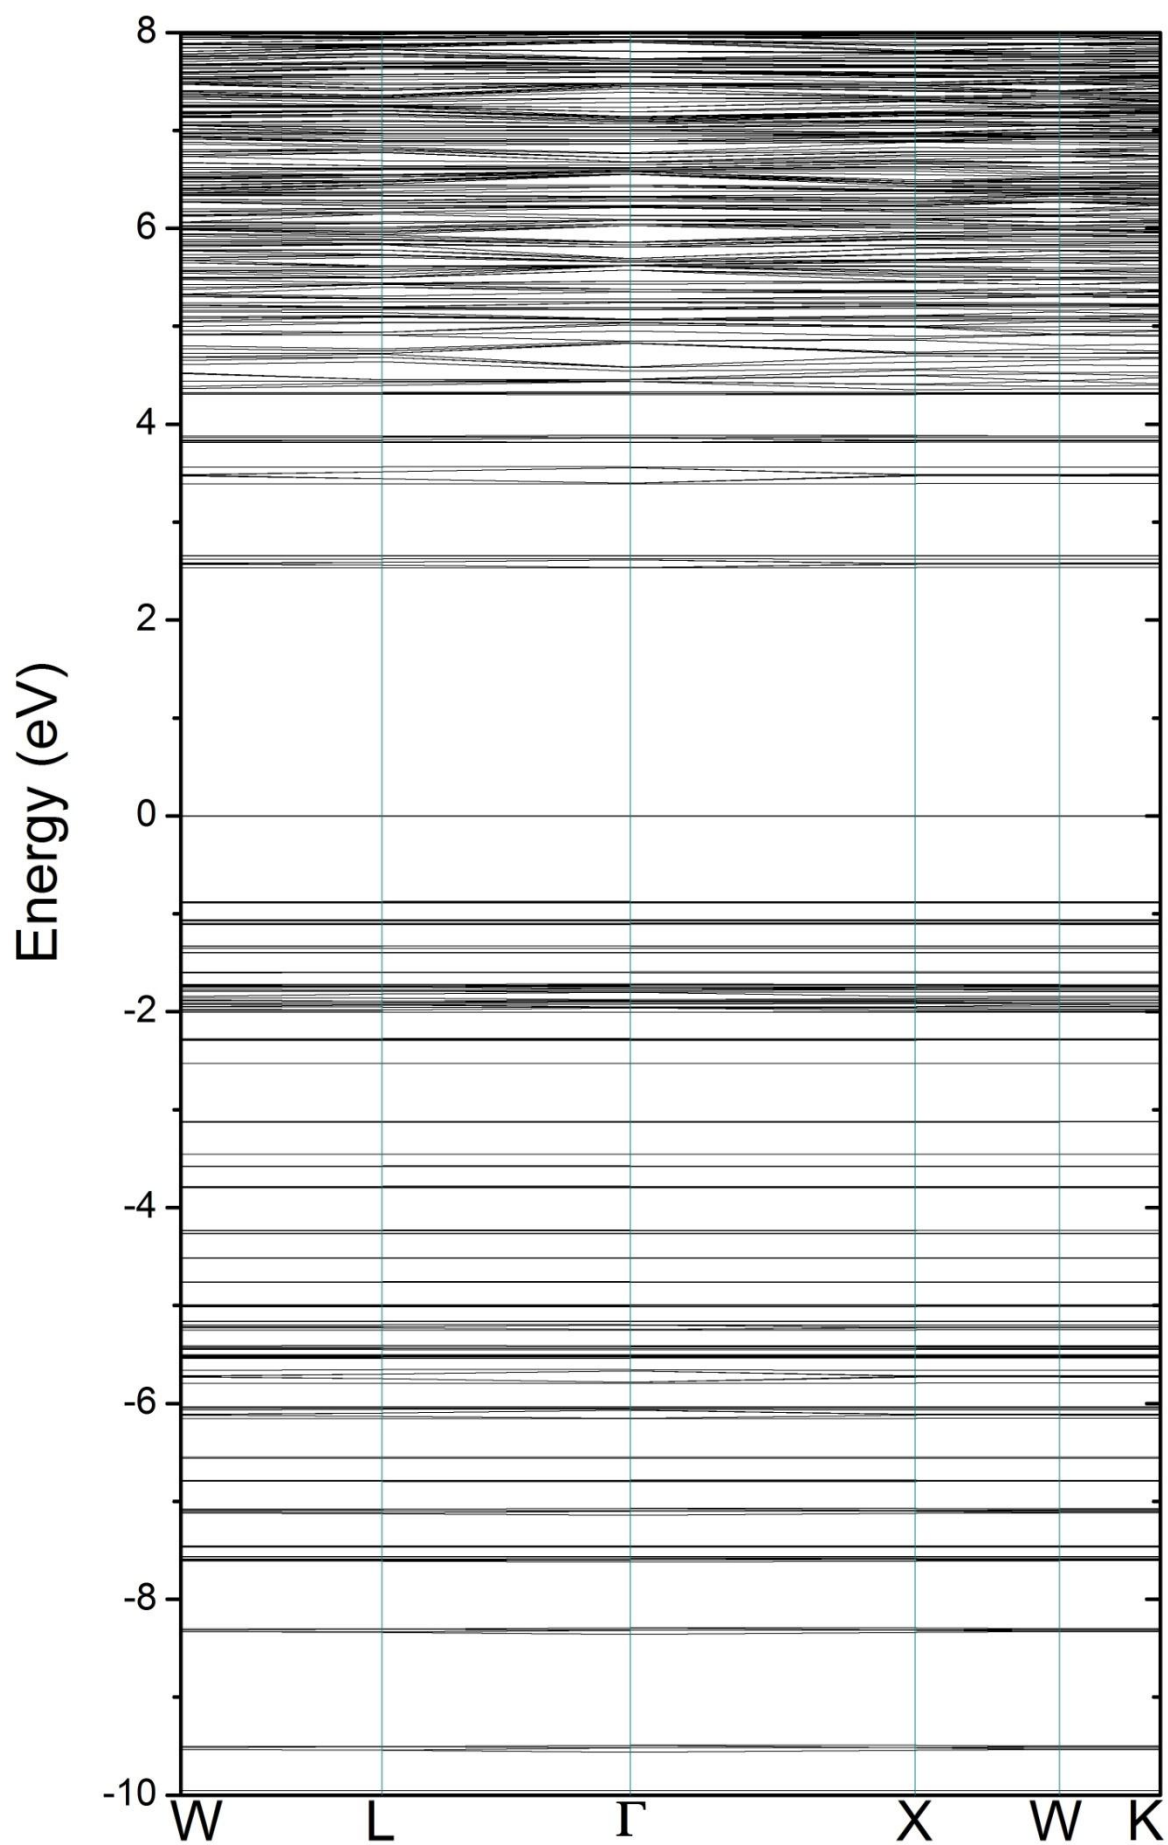

**Figure S23.** The electronic band structure of Sr-IRMOF-14. The Fermi level is set to zero and placed in the valence band maximum.



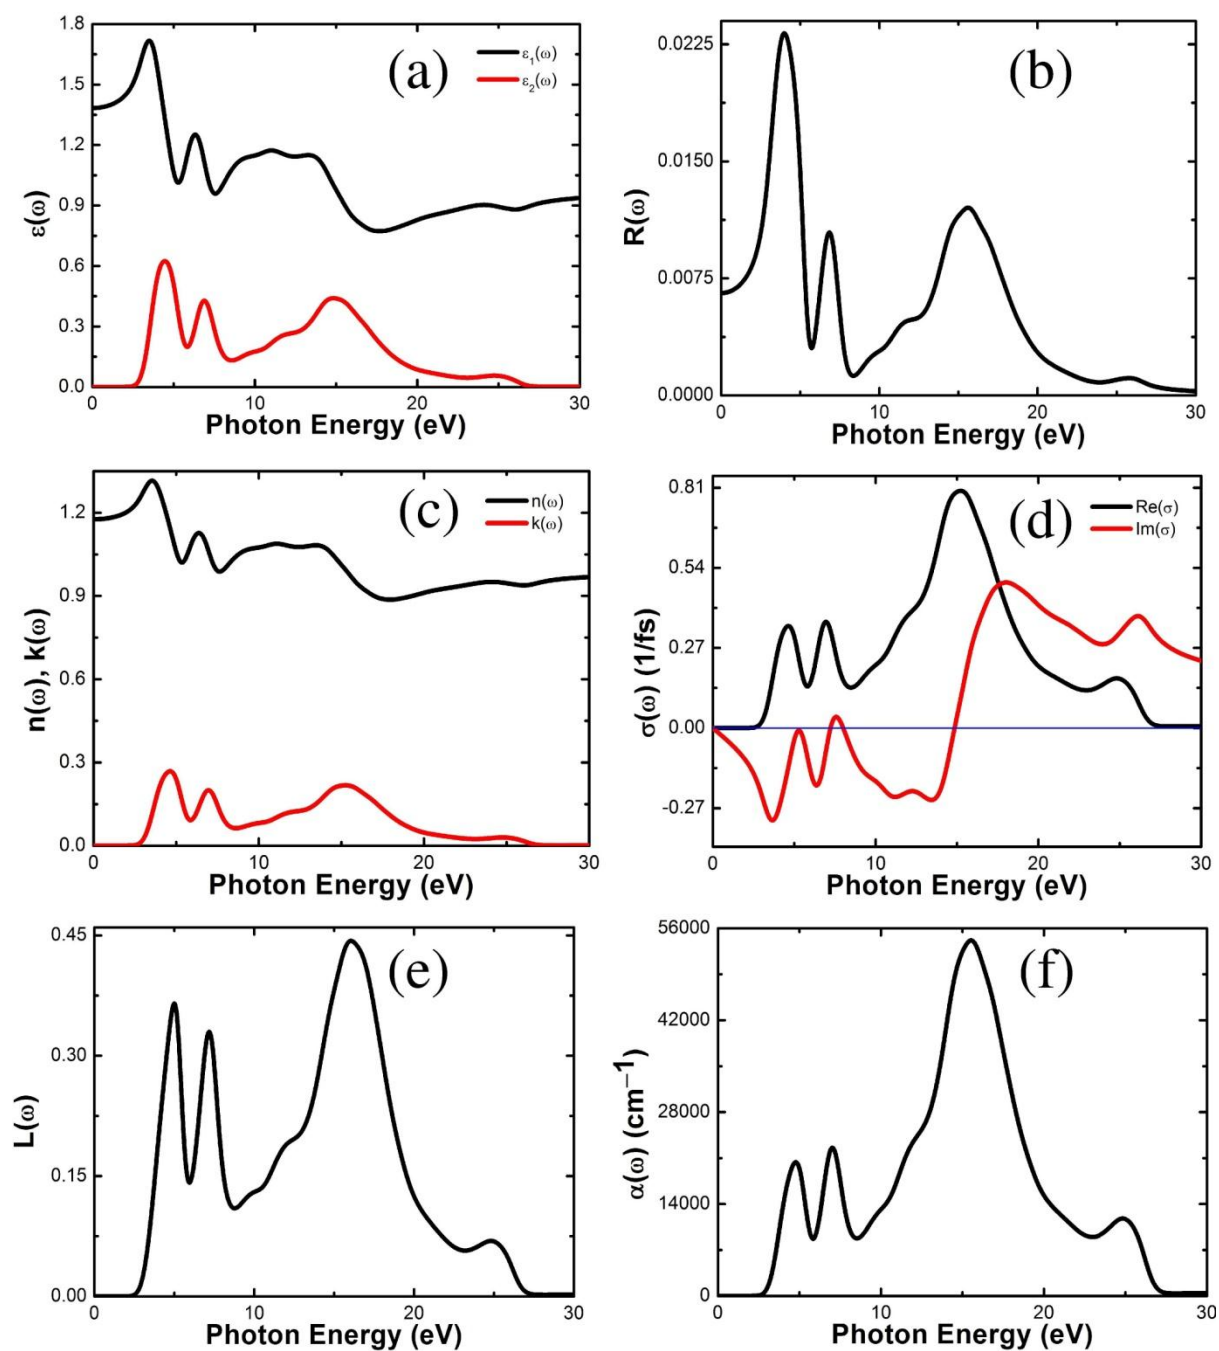

**Figure S24.** Calculated optical properties for Ba-IRMOF-14: (a) dielectric function  $\epsilon(\omega)$ , (b) reflectivity  $R(\omega)$ , (c) refractive index  $n(\omega)$ ; extinction coefficient  $k(\omega)$ , (d) optical conductivity  $\sigma(\omega)$ , (e) energy loss function  $L(\omega)$ , (f) absorption  $\alpha(\omega)$ .

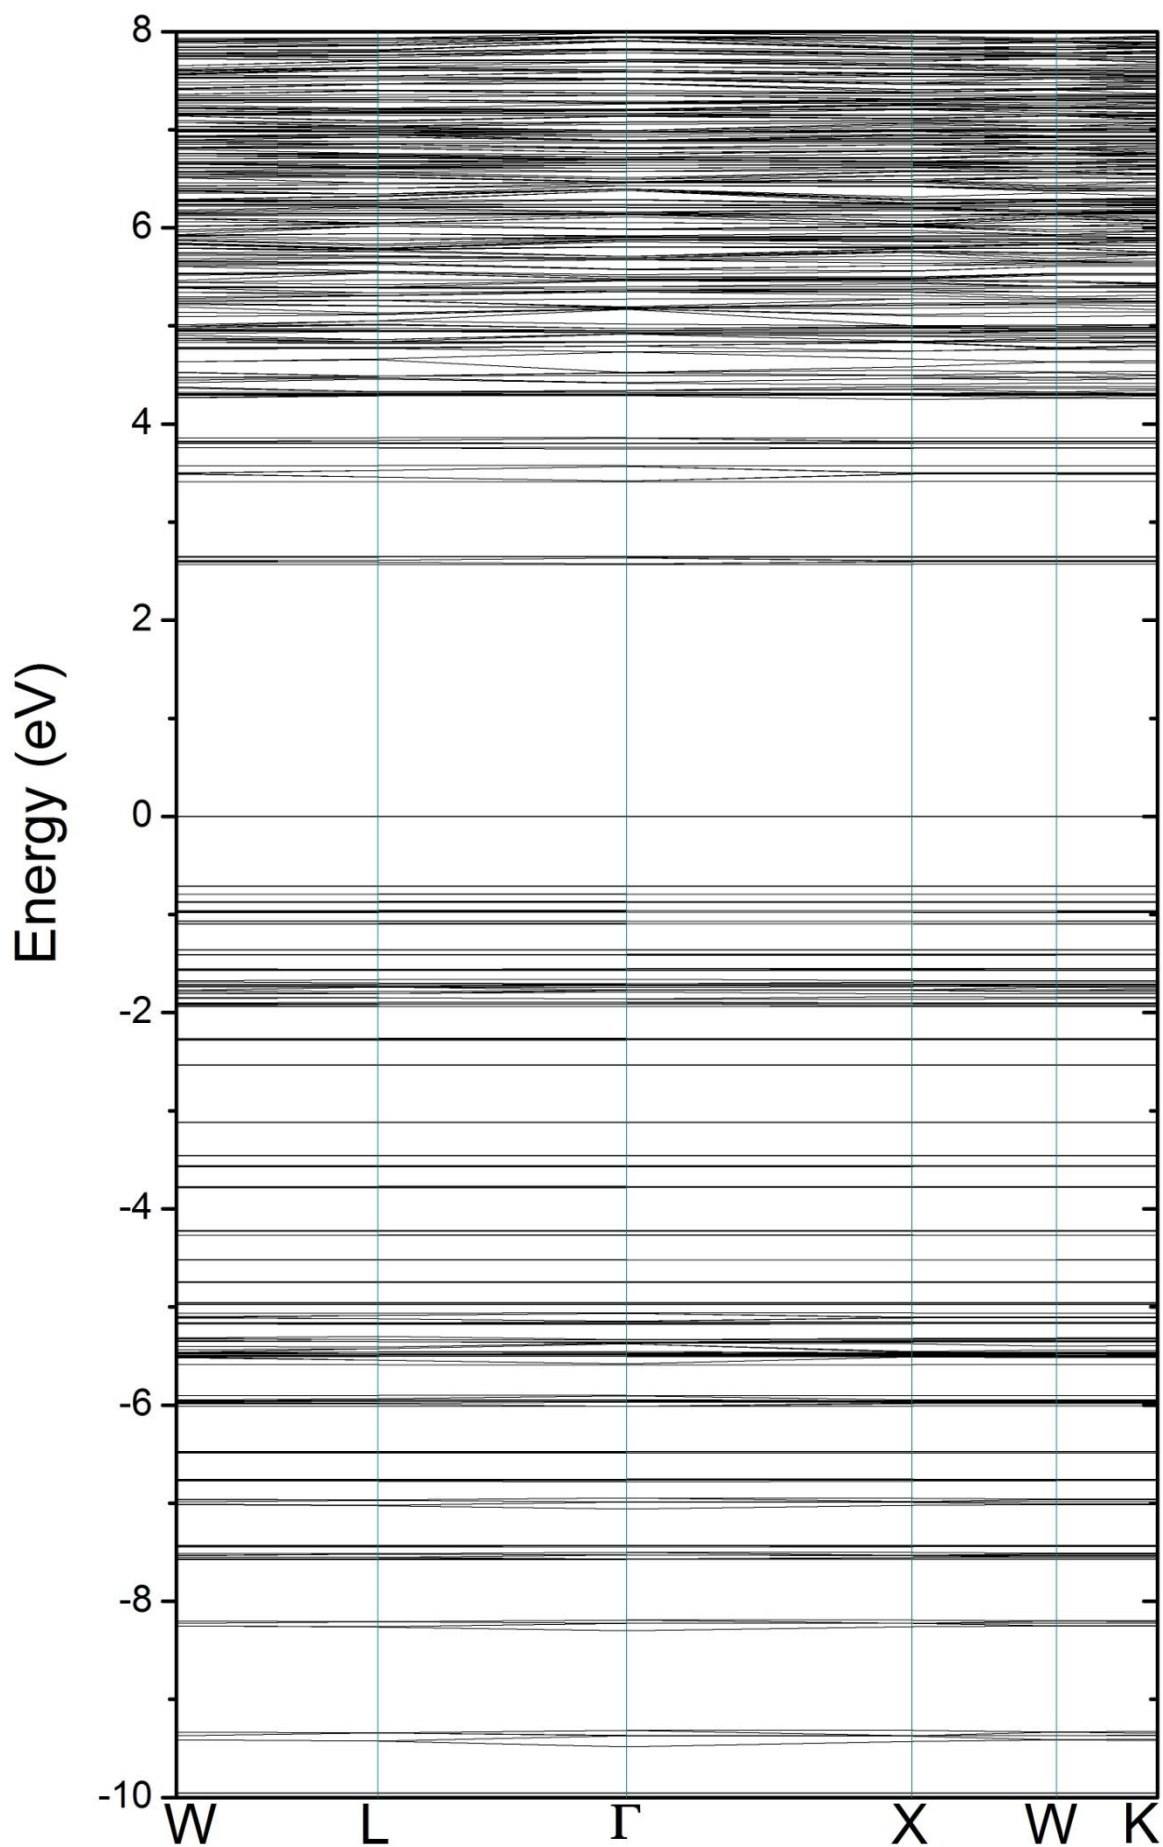

**Figure S25.** The electronic band structure of Ba-IRMOF-14. The Fermi level is set to zero and placed in the valence band maximum.

**Table S1.** Calculated Mulliken effective charges (MEC), bond overlap populations (BOP), and Bader charges (BC; given in terms of  $e$ ) for  $M$ -IRMOF-14 ( $M = \text{Zr, Cd, Be, Mg, Ca, Sr, Ba}$ ).<sup>a</sup>

| Material    | Atom  | MEC ( $e$ )  | BOP              | BC ( $e$ )   |         |
|-------------|-------|--------------|------------------|--------------|---------|
| IRMOF-14    | Zn    | +1.30        | 0.26-0.29 (Zn-O) | +1.3898      |         |
|             | O1    | -1.05        | 0.26 (O1-Zn)     | -1.3341      |         |
|             | O2    | -0.65        | 0.29 (O2-Zn)     | -1.7545      |         |
|             | C1    |              | -0.25            | 1.11 (C1-C2) | +0.0871 |
|             |       |              |                  | 1.10 (C1-C3) |         |
|             | C2    |              | -0.01            | 1.06 (C2-C5) | -0.0174 |
|             |       |              |                  | 0.98 (C2-C6) |         |
|             | C3    | -0.06        | 0.84 (C3-C4)     | -0.0564      |         |
|             | C4    | +0.61        | 0.91 (C4-O2)     | +2.6478      |         |
|             | C5    | 0.00         | 1.09 (C5-C5)     | -0.0507      |         |
|             | C6    | -0.28        | 1.21 (C6-C6)     | +0.0249      |         |
|             | H1    | +0.27        | 0.90 (H1-C1)     | +0.0348      |         |
| H2          | +0.29 | 0.87 (H2-C6) | +0.0027          |              |         |
| Cd-IRMOF-14 | Cd    | +1.27        | 0.21-0.23 (Cd-O) | +1.3248      |         |
|             | O1    | -1.02        | 0.21 (O1-Cd)     | -1.2151      |         |
|             | O2    | -0.65        | 0.23 (O2-Cd)     | -1.7489      |         |
|             | C1    |              | -0.25            | 1.10 (C1-C2) | +0.0799 |
|             |       |              |                  | 1.10 (C1-C3) |         |
|             | C2    |              | -0.01            | 1.06 (C2-C5) | -0.0038 |
|             |       |              |                  | 0.98 (C2-C6) |         |
|             | C3    | -0.06        | 0.83 (C3-C4)     | -0.0431      |         |
|             | C4    | +0.63        | 0.90 (C4-O2)     | +2.6542      |         |
|             | C5    | 0.00         | 1.09 (C5-C5)     | -0.0404      |         |
|             | C6    | -0.28        | 1.21 (C6-C6)     | -0.0046      |         |
|             | H1    | +0.27        | 0.89 (H1-C1)     | +0.0228      |         |
| H2          | +0.29 | 0.87 (H2-C6) | +0.0288          |              |         |
| Be-IRMOF-14 | Be    | +1.14        | 0.36-0.37 (Be-O) | +2.0000      |         |
|             | O1    | -0.96        | 0.37 (O1-Be)     | -2.0012      |         |
|             | O2    | -0.63        | 0.36 (O2-Be)     | -1.9093      |         |
|             | C1    |              | -0.26            | 1.10 (C1-C2) | +0.0720 |
|             |       |              |                  | 1.09 (C1-C3) |         |
|             | C2    |              | -0.01            | 1.06 (C2-C5) | +0.0046 |
|             |       |              |                  | 0.98 (C2-C6) |         |
|             | C3    | -0.05        | 0.85 (C3-C4)     | -0.0635      |         |
|             | C4    | +0.61        | 0.92 (C4-O2)     | +2.6509      |         |
|             | C5    | +0.01        | 1.09 (C5-C5)     | -0.0501      |         |
|             | C6    | -0.28        | 1.21 (C6-C6)     | +0.0166      |         |
|             | H1    | +0.30        | 0.87 (H1-C1)     | +0.0400      |         |
| H2          | +0.30 | 0.87 (H2-C6) | +0.0077          |              |         |
| Mg-IRMOF-14 | Mg    | +1.59        | 0.23 (Mg-O)      | +2.0000      |         |
|             | O1    | -1.29        | 0.23 (O1-Mg)     | -1.9977      |         |
|             | O2    | -0.71        | 0.23 (O2-Mg)     | -1.9009      |         |
|             | C1    |              | -0.25            | 1.11 (C1-C2) | +0.0432 |
|             |       |              |                  | 1.10 (C1-C3) |         |
|             | C2    |              | -0.01            | 1.06 (C2-C5) | -0.0446 |
|             |       |              |                  | 0.98 (C2-C6) |         |
|             | C3    | -0.07        | 0.85 (C3-C4)     | -0.0203      |         |
|             | C4    | +0.60        | 0.91 (C4-O2)     | +2.6735      |         |
| C5          | 0.00  | 1.09 (C5-C5) | +0.0247          |              |         |

|             |       |              |                  |         |
|-------------|-------|--------------|------------------|---------|
|             | C6    | -0.28        | 1.21 (C6-C6)     | -0.0312 |
|             | H1    | +0.27        | 0.90 (H1-C1)     | +0.0558 |
|             | H2    | +0.29        | 0.87 (H2-C6)     | +0.0385 |
| Ca-IRMOF-14 | Ca    | +1.35        | 0.14-0.18 (Ca-O) | +1.6188 |
|             | O1    | -1.15        | 0.18 (O1-Ca)     | -1.4955 |
|             | O2    | -0.70        | 0.14 (O2-Ca)     | -1.8283 |
|             | C1    | -0.26        | 1.10 (C1-C2)     | -0.0003 |
|             |       |              | 1.09 (C1-C3)     |         |
|             | C2    | -0.01        | 1.06 (C2-C5)     | -0.0057 |
|             |       |              | 0.98 (C2-C6)     |         |
|             | C3    | -0.06        | 0.82 (C3-C4)     | +0.0032 |
|             | C4    | +0.66        | 0.89 (C4-O2)     | +2.7311 |
|             | C5    | 0.00         | 1.09 (C5-C5)     | -0.0182 |
|             | C6    | -0.28        | 1.21 (C6-C6)     | +0.0035 |
|             | H1    | +0.30        | 0.87 (H1-C1)     | +0.0411 |
| H2          | +0.29 | 0.87 (H2-C6) | +0.0167          |         |
| Sr-IRMOF-14 | Sr    | +1.39        | 0.14-0.17 (Sr-O) | +1.6118 |
|             | O1    | -1.14        | 0.17 (O1-Sr)     | -1.4597 |
|             | O2    | -0.70        | 0.14 (O2-Sr)     | -1.8202 |
|             | C1    | -0.26        | 1.10 (C1-C2)     | +0.0615 |
|             |       |              | 1.09 (C1-C3)     |         |
|             | C2    | -0.01        | 1.06 (C2-C5)     | +0.0098 |
|             |       |              | 0.98 (C2-C6)     |         |
|             | C3    | -0.06        | 0.82 (C3-C4)     | -0.0730 |
|             | C4    | +0.64        | 0.89 (C4-O2)     | +2.6979 |
|             | C5    | 0.00         | 1.09 (C5-C5)     | -0.0578 |
|             | C6    | -0.28        | 1.21 (C6-C6)     | +0.0165 |
|             | H1    | +0.30        | 0.87 (H1-C1)     | +0.0303 |
| H2          | +0.29 | 0.87 (H2-C6) | +0.0031          |         |
| Ba-IRMOF-14 | Ba    | +1.37        | 0.11-0.16 (Ba-O) | +1.6127 |
|             | O1    | -1.08        | 0.16 (O1-Ba)     | -1.4214 |
|             | O2    | -0.69        | 0.11 (O2-Ba)     | -1.8273 |
|             | C1    | -0.26        | 1.10 (C1-C2)     | +0.0697 |
|             |       |              | 1.09 (C1-C3)     |         |
|             | C2    | -0.01        | 1.06 (C2-C5)     | -0.0109 |
|             |       |              | 0.98 (C2-C6)     |         |
|             | C3    | -0.06        | 0.81 (C3-C4)     | -0.0702 |
|             | C4    | +0.64        | 0.89 (C4-O2)     | +2.7244 |
|             | C5    | 0.00         | 1.09 (C5-C5)     | -0.0535 |
|             | C6    | -0.28        | 1.21 (C6-C6)     | +0.0210 |
|             | H1    | +0.29        | 0.87 (H1-C1)     | +0.0294 |
| H2          | +0.29 | 0.87 (H2-C6) | -0.0013          |         |

<sup>a</sup> The atoms are numbered according to Fig. 1 and the partial density of states (PDOS) in Fig. 3 in the electronic structure section of the manuscript.
